# Supplementary material for: Proteomic and Bioinformatic Investigation of Altered Pathways in Neuroglobin-Deficient Breast Cancer Cells
Source: Molecules. 2021 Apr 20;26(8):2397. doi: 10.3390/molecules26082397 (PMC8074618; doi:10.3390/molecules26082397)
Supplement: Supplementary file 1 [file molecules-26-02397-s001.zip › molecules-1159227-supplementary/supplementary tables.xlsx]

## Sheet: KOvsNEG
Supplementary Table 1. List of the differentially regulated proteins in the NGB-KO vs Neg proteome
Gene names	Protein IDs	Protein names	Difference
ITGA2	P17301	Integrin alpha-2	-2.35943
DYNC1I2	Q13409	Cytoplasmic dynein 1 intermediate chain 2	-2.32026
PTGES	O14684	Prostaglandin E synthase	-2.30543
MYH10	P35580	Myosin-10	-2.23713
FABP5	Q01469	Fatty acid-binding protein, epidermal	-2.16994
PTGR1	Q14914	Prostaglandin reductase 1	-2.04278
CDV3	Q9UKY7	Protein CDV3 homolog	-1.71977
CRABP1	P29762	Cellular retinoic acid-binding protein 1	-1.71885
EIF3K	Q9UBQ5	Eukaryotic translation initiation factor 3 subunit K	-1.69308
LGALS1	P09382	Galectin-1	-1.68357
KIAA1324	Q6UXG2	UPF0577 protein KIAA1324	-1.48568
PIN4	Q9Y237	Peptidyl-prolyl cis-trans isomerase NIMA-interacting 4	-1.48401
PALLD	Q8WX93	Palladin	-1.40918
DYNC1H1	Q14204	Cytoplasmic dynein 1 heavy chain 1	-1.3783
ASS1	P00966	Argininosuccinate synthase	-1.31388
CTBP2	Q5SQP8	C-terminal-binding protein 2	-1.21621
SDHB	P21912	Succinate dehydrogenase [ubiquinone] iron-sulfur subunit, mitochondrial	-1.14734
PLOD2	O00469	Procollagen-lysine,2-oxoglutarate 5-dioxygenase 2	-1.142
RAD23A	P54725	UV excision repair protein RAD23 homolog A	-1.10382
SLC25A1	P53007	Tricarboxylate transport protein, mitochondrial	-1.1036
FLNB	O75369	Filamin-B	-1.10101
AHSA1	O95433	Activator of 90 kDa heat shock protein ATPase homolog 1	-1.08829
UBL3	O95164	Ubiquitin-like protein 3	-1.08602
ECE1	P42892	Endothelin-converting enzyme 1	-1.04023
RAP2C	Q9Y3L5	Ras-related protein Rap-2c	-1.03131
DDAH2	O95865	N(G),N(G)-dimethylarginine dimethylaminohydrolase 2	-0.983247
PRPF6	O94906	Pre-mRNA-processing factor 6	-0.942884
GFM1	Q96RP9	Elongation factor G, mitochondrial	-0.928267
SEL1L	Q9UBV2	Protein sel-1 homolog 1	-0.86981
PIR	O00625	Pirin	-0.868196
WARS	P23381	Tryptophan--tRNA ligase, cytoplasmic	-0.84946
CUL2	Q13617	Cullin-2	-0.848414
ANXA1	P04083	Annexin A1	-0.840476
CD47	Q08722	Leukocyte surface antigen CD47	-0.831978
SEC61A1	P61619	Protein transport protein Sec61 subunit alpha isoform 1	-0.823292
PITPNB	P48739	Phosphatidylinositol transfer protein beta isoform	-0.821575
GLA	P06280	Alpha-galactosidase A	-0.793822
MSI2	Q96DH6	RNA-binding protein Musashi homolog 2	-0.79378
MOCS2	O96007	Molybdopterin synthase catalytic subunit	-0.767708
FAH	P16930	Fumarylacetoacetase	-0.764043
CRKL	P46109	Crk-like protein	-0.744218
MYH14	Q7Z406	Myosin-14	-0.740128
ALDOC	P09972	Fructose-bisphosphate aldolase C	-0.734972
TWF2	Q6IBS0	Twinfilin-2	-0.727805
CLTB	P09497	Clathrin light chain B	-0.726693
NT5DC1	Q5TFE4	5-nucleotidase domain-containing protein 1	-0.726048
AKT1	P31749	RAC-alpha serine/threonine-protein kinase	-0.724333
IST1	P53990	IST1 homolog	-0.723485
SH3BGRL	O75368	SH3 domain-binding glutamic acid-rich-like protein	-0.718014
MTA1	Q13330	Metastasis-associated protein MTA1	-0.711637
ISG15	P05161	Ubiquitin-like protein ISG15	-0.706613
SOD1	P00441	Superoxide dismutase [Cu-Zn]	-0.697462
EIF3L	Q9Y262	Eukaryotic translation initiation factor 3 subunit L	-0.688668
MCM5	P33992	DNA replication licensing factor MCM5	-0.686941
RRP12	Q5JTH9	RRP12-like protein	-0.68494
HSP90AA1	P07900	Heat shock protein HSP 90-alpha	-0.683802
C12orf10	Q9HB07	UPF0160 protein MYG1, mitochondrial	-0.682927
EIF4A2	Q14240	Eukaryotic initiation factor 4A-II	-0.677138
BCCIP	Q9P287	BRCA2 and CDKN1A-interacting protein	-0.66608
PRKCD	Q05655	Protein kinase C delta type	-0.662893
APEH	P13798	Acylamino-acid-releasing enzyme	-0.6618
SARS2	Q9NP81	Serine--tRNA ligase, mitochondrial	-0.66048
L2HGDH	Q9H9P8	L-2-hydroxyglutarate dehydrogenase, mitochondrial	-0.658304
CLTC	Q00610	Clathrin heavy chain 1	-0.65795
HPCAL1	P37235	Hippocalcin-like protein 1	-0.654963
USMG5	Q96IX5	Up-regulated during skeletal muscle growth protein 5	-0.650734
HPRT1	P00492	Hypoxanthine-guanine phosphoribosyltransferase	-0.647224
QARS	P47897	Glutamine--tRNA ligase	-0.641968
PDHA1	P08559	Pyruvate dehydrogenase E1 component subunit alpha, somatic form, mitochondrial	-0.635438
GALNT6	Q8NCL4	Polypeptide N-acetylgalactosaminyltransferase 6	-0.630251
GSN	P06396	Gelsolin	-0.609026
VDAC2	P45880	Voltage-dependent anion-selective channel protein 2	-0.608231
AK4	P27144	Adenylate kinase 4, mitochondrial	-0.606284
SELENBP1	Q13228	Selenium-binding protein 1	-0.601838
PLAA	Q9Y263	Phospholipase A-2-activating protein	-0.60121
EIF3E	P60228	Eukaryotic translation initiation factor 3 subunit E	-0.585761
PRKDC	P78527	DNA-dependent protein kinase catalytic subunit	-0.576732
MT-CO2	P00403	Cytochrome c oxidase subunit 2	-0.573946
PLS1	Q14651	Plastin-1	-0.572933
TATDN1	Q6P1N9	Putative deoxyribonuclease TATDN1	-0.571698
CAT	P04040	Catalase	-0.566761
PSMD2	Q13200	26S proteasome non-ATPase regulatory subunit 2	-0.563678
KRT18	P05783	Keratin, type I cytoskeletal 18	-0.557777
TMCO1	Q9UM00	Transmembrane and coiled-coil domain-containing protein 1	-0.548103
VCL	P18206	Vinculin	-0.546203
EIF2A	Q9BY44	Eukaryotic translation initiation factor 2A	-0.544558
PPIH	O43447	Peptidyl-prolyl cis-trans isomerase	-0.543183
ATP2B1	P20020	Plasma membrane calcium-transporting ATPase 1	-0.540636
DDX17	Q92841	Probable ATP-dependent RNA helicase DDX17	-0.532726
DDX1	Q92499	ATP-dependent RNA helicase DDX1	-0.531923
COTL1	Q14019	Coactosin-like protein	-0.531337
UQCR10	Q9UDW1	Cytochrome b-c1 complex subunit 9	-0.531301
GSTM3	P21266	Glutathione S-transferase Mu 3	-0.516284
ABAT	P80404	4-aminobutyrate aminotransferase, mitochondrial	-0.514808
PDIA6	Q15084	Protein disulfide-isomerase A6	-0.50833
XPO5	Q9HAV4	Exportin-5	-0.502691
PFN2	P35080	Profilin-2	-0.500651
PNP	P00491	Purine nucleoside phosphorylase	-0.491963
PSMG2	Q969U7	Proteasome assembly chaperone 2	-0.490206
PSMC2	P35998	26S protease regulatory subunit 7	-0.47355
PRMT5	O14744	Protein arginine N-methyltransferase 5	-0.471047
RTCB	Q9Y3I0	tRNA-splicing ligase RtcB homolog	-0.45989
STARD10	Q9Y365	PCTP-like protein	0.452497
NQO1	P15559	NAD(P)H dehydrogenase [quinone] 1	0.504692
CARM1	Q86X55	Histone-arginine methyltransferase CARM1	0.506315
SLC3A2	P08195	4F2 cell-surface antigen heavy chain	0.546717
RPL15	P61313	60S ribosomal protein L15	0.556191
NAP1L1	P55209	Nucleosome assembly protein 1-like 1	0.557814
EPB41L5	Q9HCM4	Band 4.1-like protein 5	0.562425
RPS11	P62280	40S ribosomal protein S11	0.567485
SRSF3	P84103	Serine/arginine-rich splicing factor 3	0.573704
RPS7	P62081	40S ribosomal protein S7	0.587573
LMNB1	P20700	Lamin-B1	0.606635
NUCKS1	Q9H1E3	Nuclear ubiquitous casein and cyclin-dependent kinase substrate 1	0.608472
RPS26	P62854	40S ribosomal protein S26	0.613451
TBCB	Q99426	Tubulin-folding cofactor B	0.636705
TMPO	P42167	Lamina-associated polypeptide 2, isoforms beta/gamma	0.643885
TMED9	Q9BVK6	Transmembrane emp24 domain-containing protein 9	0.673123
SERBP1	Q8NC51	Plasminogen activator inhibitor 1 RNA-binding protein	0.673398
NUCB2	P80303	Nucleobindin-2	0.676481
STOML2	Q9UJZ1	Stomatin-like protein 2, mitochondrial	0.676978
STMN1	P16949	Stathmin	0.724104
SRSF2	Q01130	Serine/arginine-rich splicing factor 2	0.728389
PTMA	P06454	Prothymosin alpha	0.730142
LMCD1	Q9NZU5	LIM and cysteine-rich domains protein 1	0.73138
RPL29	P47914	60S ribosomal protein L29	0.747825
PRKAR1A	P10644	cAMP-dependent protein kinase type I-alpha regulatory subunit	0.758717
RDX	P35241	Radixin	0.764874
NUCB1	Q02818	Nucleobindin-1	0.806406
HSPD1	P10809	60 kDa heat shock protein, mitochondrial	0.833023
ISOC2	Q96AB3	Isochorismatase domain-containing protein 2, mitochondrial	0.83679
CFL1	P23528	Cofilin-1	0.837858
HNRNPA0	Q13151	Heterogeneous nuclear ribonucleoprotein A0	0.841068
ABCG2	Q9UNQ0	ATP-binding cassette sub-family G member 2	0.89906
TPBG	Q13641	Trophoblast glycoprotein	0.912963
LXN	Q9BS40	Latexin	0.913877
TGOLN2	O43493	Trans-Golgi network integral membrane protein 2	0.924468
HINT1	P49773	Histidine triad nucleotide-binding protein 1	0.945602
HEATR6	Q6AI08	HEAT repeat-containing protein 6	1.01023
PIGK	Q92643	GPI-anchor transamidase	1.05895
PDLIM5	Q96HC4	PDZ and LIM domain protein 5	1.08042
RPS23	P62266	40S ribosomal protein S23	1.09367
L1CAM	P32004	Neural cell adhesion molecule L1	1.11429
VAMP7	P51809	Vesicle-associated membrane protein 7	1.2032
CALU	O43852	Calumenin	1.26947
ABI1	Q8IZP0	Abl interactor 1	1.28019
RAB39A	Q14964	Ras-related protein Rab-39A	1.29416
ATP5I	P56385	ATP synthase subunit e, mitochondrial	1.30152
AIP	O00170	AH receptor-interacting protein	1.38018
GIPC1	O14908	PDZ domain-containing protein GIPC1	1.40621
PLS3	P13797	Plastin-3	1.41594
RPLP2	P05387	60S acidic ribosomal protein P2	1.62862
AKR1C2	P52895	Aldo-keto reductase family 1 member C2	1.91441
ACTC1	P68032	Actin, alpha cardiac muscle 1	2.02807
TRA2B	P62995	Transformer-2 protein homolog beta	2.13421
SRSF7	Q16629	Serine/arginine-rich splicing factor 7	2.36826

## Sheet: E2
Supplementary Table 2. List of the differentially regulated proteins in the NGB-KO+E2 vs Neg+E2 proteome
Gene names	Protein IDs	Protein names	Difference
LGALS1	P09382	Galectin-1	-2.44698
HSP90AB2P	Q58FF8	Putative heat shock protein HSP 90-beta 2	-2.4408
TPM3	P06753	Tropomyosin alpha-3 chain	-2.41592
ITGA2	P17301	Integrin alpha-2	-2.24424
UQCRQ	O14949	Cytochrome b-c1 complex subunit 8	-2.15058
SEC61B	P60468	Protein transport protein Sec61 subunit beta	-1.98259
DYNC1I2	Q13409	Cytoplasmic dynein 1 intermediate chain 2	-1.94617
MYH10	P35580	Myosin-10	-1.93363
MIF	P14174	Macrophage migration inhibitory factor	-1.91606
RHOC	P08134	Rho-related GTP-binding protein RhoC	-1.82592
ANXA6	P08133	Annexin A6	-1.63503
YBX3	P16989	Y-box-binding protein 3	-1.62335
SOD1	P00441	Superoxide dismutase [Cu-Zn]	-1.62122
HSPA4L	O95757	Heat shock 70 kDa protein 4L	-1.60817
CSNK2B	P67870	Casein kinase II subunit beta	-1.54929
DYNC1LI1	Q9Y6G9	Cytoplasmic dynein 1 light intermediate chain 1	-1.53413
DYNC1H1	Q14204	Cytoplasmic dynein 1 heavy chain 1	-1.51204
SDHB	P21912	Succinate dehydrogenase [ubiquinone] iron-sulfur subunit, mitochondrial	-1.49011
PTGR1	Q14914	Prostaglandin reductase 1	-1.48375
CUL2	Q13617	Cullin-2	-1.44131
FABP5	Q01469	Fatty acid-binding protein, epidermal	-1.4347
PLOD2	O00469	Procollagen-lysine,2-oxoglutarate 5-dioxygenase 2	-1.42237
ZPR1	O75312	Zinc finger protein ZPR1	-1.40524
GSTZ1	O43708	Maleylacetoacetate isomerase	-1.40048
RALA	P11233	Ras-related protein Ral-A	-1.39661
CTBP2	P56545	C-terminal-binding protein 2	-1.36251
S100A10	P60903	Protein S100-A10	-1.31502
DDT	P30046	D-dopachrome decarboxylase	-1.30377
MOCS2	O96007	Molybdopterin synthase catalytic subunit	-1.24654
M6PR	P20645	Cation-dependent mannose-6-phosphate receptor	-1.23684
CLTB	P09497	Clathrin light chain B	-1.2357
PDE12	Q6L8Q7	2,5-phosphodiesterase 12	-1.17889
HMGN1	P05114	Non-histone chromosomal protein HMG-14	-1.12054
ANP32A	P39687	Acidic leucine-rich nuclear phosphoprotein 32 family member A	-1.11365
AHSA1	O95433	Activator of 90 kDa heat shock protein ATPase homolog 1	-1.10524
DDX18	Q9NVP1	ATP-dependent RNA helicase DDX18	-1.10464
RAP2C	Q9Y3L5	Ras-related protein Rap-2c	-1.10464
PALLD	Q8WX93	Palladin	-1.10154
PIN4	Q9Y237	Peptidyl-prolyl cis-trans isomerase NIMA-interacting 4	-1.08654
RPS27	P42677	40S ribosomal protein S27	-1.08518
CYB561	P49447	Cytochrome b561	-1.08122
SLC2A1	P11166	Solute carrier family 2, facilitated glucose transporter member 1	-1.073
KIAA1279	Q96EK5	KIF1-binding protein	-1.06822
GALNT2	Q10471	Polypeptide N-acetylgalactosaminyltransferase 2	-1.05031
HACD2	Q6Y1H2	Very-long-chain (3R)-3-hydroxyacyl-CoA dehydratase 2	-1.04409
SEL1L	Q9UBV2	Protein sel-1 homolog 1	-1.03926
BDH1	Q02338	D-beta-hydroxybutyrate dehydrogenase, mitochondrial	-1.02874
UBTF	P17480	Nucleolar transcription factor 1	-1.02022
HMCES	Q96FZ2	Embryonic stem cell-specific 5-hydroxymethylcytosine-binding protein	-1.00948
UBL3	O95164	Ubiquitin-like protein 3	-0.996203
COMT	P21964	Catechol O-methyltransferase	-0.992427
HIST1H1B	P16401	Histone H1.5	-0.987637
THOC2	Q8NI27	THO complex subunit 2	-0.976454
PTGES3	Q15185	Prostaglandin E synthase 3	-0.963392
TSFM	P43897	Elongation factor Ts, mitochondrial	-0.957456
NDRG3	Q9UGV2	Protein NDRG3	-0.952595
FLNB	O75369	Filamin-B	-0.943583
P4HA1	P13674	Prolyl 4-hydroxylase subunit alpha-1	-0.939913
ASS1	P00966	Argininosuccinate synthase	-0.935617
SEC61A1	P61619	Protein transport protein Sec61 subunit alpha isoform 1	-0.931851
BASP1	P80723	Brain acid soluble protein 1	-0.92741
SLC25A1	P53007	Tricarboxylate transport protein, mitochondrial	-0.916284
WARS	P23381	Tryptophan--tRNA ligase, cytoplasmic	-0.912964
POP1	Q99575	Ribonucleases P/MRP protein subunit POP1	-0.902997
ANXA1	P04083	Annexin A1	-0.884125
DPM1	O60762	Dolichol-phosphate mannosyltransferase subunit 1	-0.880861
CORO7	P57737	Coronin-7	-0.875936
TMX4	Q9H1E5	Thioredoxin-related transmembrane protein 4	-0.872601
TOR1B	O14657	Torsin-1B	-0.862679
U2SURP	O15042	U2 snRNP-associated SURP motif-containing protein	-0.852383
EPCAM	P16422	Epithelial cell adhesion molecule	-0.82834
HSP90AA1	P07900	Heat shock protein HSP 90-alpha	-0.812716
AIFM2	Q9BRQ8	Apoptosis-inducing factor 2	-0.809592
PGAM1	P18669	Phosphoglycerate mutase 1	-0.80954
STT3B	Q8TCJ2	Dolichyl-diphosphooligosaccharide--protein glycosyltransferase subunit STT3B	-0.79394
SRPRB	Q9Y5M8	Signal recognition particle receptor subunit beta	-0.790345
APEX1	P27695	DNA-(apurinic or apyrimidinic site) lyase	-0.789771
UBE2H	P62256	Ubiquitin-conjugating enzyme E2 H	-0.783667
SLC44A2	Q8IWA5	Choline transporter-like protein 2	-0.77228
EIF3G	O75821	Eukaryotic translation initiation factor 3 subunit G	-0.767958
TWF2	Q6IBS0	Twinfilin-2	-0.766343
ALDOC	P09972	Fructose-bisphosphate aldolase C	-0.758517
GFM1	Q96RP9	Elongation factor G, mitochondrial	-0.756912
AK4	P27144	Adenylate kinase 4, mitochondrial	-0.755794
CIAPIN1	Q6FI81	Anamorsin	-0.754832
PIR	O00625	Pirin	-0.749223
TOP2B	Q02880	DNA topoisomerase 2-beta	-0.748254
APEH	P13798	Acylamino-acid-releasing enzyme	-0.740942
GALNT6	Q8NCL4	Polypeptide N-acetylgalactosaminyltransferase 6	-0.731686
BLVRB	P30043	Flavin reductase (NADPH)	-0.723235
RCC1	P18754	Regulator of chromosome condensation	-0.708578
CLIC4	Q9Y696	Chloride intracellular channel protein 4	-0.697592
PRKCD	Q05655	Protein kinase C delta type	-0.696114
EIF2S2	P20042	Eukaryotic translation initiation factor 2 subunit 2	-0.694366
L2HGDH	Q9H9P8	L-2-hydroxyglutarate dehydrogenase, mitochondrial	-0.689537
ECE1	P42892	Endothelin-converting enzyme 1	-0.686931
MYL12A	P19105	Myosin regulatory light chain 12A	-0.685465
PLS1	Q14651	Plastin-1	-0.68228
NT5DC1	Q5TFE4	5-nucleotidase domain-containing protein 1	-0.680817
PRMT5	O14744	Protein arginine N-methyltransferase 5	-0.678641
CPSF6	Q16630	Cleavage and polyadenylation specificity factor subunit 6	-0.67002
ARL8B	Q9NVJ2	ADP-ribosylation factor-like protein 8B	-0.668269
ATP2B1	P20020	Plasma membrane calcium-transporting ATPase 1	-0.66771
KIAA1324	Q6UXG2	UPF0577 protein KIAA1324	-0.662574
QARS	P47897	Glutamine--tRNA ligase	-0.662517
MANF	P55145	Mesencephalic astrocyte-derived neurotrophic factor	-0.661595
SHMT2	P34897	Serine hydroxymethyltransferase, mitochondrial	-0.655039
B3GAT3	O94766	Galactosylgalactosylxylosylprotein 3-beta-glucuronosyltransferase 3	-0.649032
LAMP2	P13473	Lysosome-associated membrane glycoprotein 2	-0.642182
GLRX3	O76003	Glutaredoxin-3	-0.638546
LYAR	Q9NX58	Cell growth-regulating nucleolar protein	-0.636403
ECHS1	P30084	Enoyl-CoA hydratase, mitochondrial	-0.635608
PLAA	Q9Y263	Phospholipase A-2-activating protein	-0.633767
CBR1	P16152	Carbonyl reductase [NADPH] 1	-0.631552
PGAM5	Q96HS1	Serine/threonine-protein phosphatase PGAM5, mitochondrial	-0.63
ATP1B3	P54709	Sodium/potassium-transporting ATPase subunit beta-3	-0.629475
ERLIN1	O75477	Erlin-1	-0.626154
PSMG1	O95456	Proteasome assembly chaperone 1	-0.619248
DDX17	Q92841	Probable ATP-dependent RNA helicase DDX17	-0.617792
CAT	P04040	Catalase	-0.616002
UQCR10	Q9UDW1	Cytochrome b-c1 complex subunit 9	-0.615333
SCCPDH	Q8NBX0	Saccharopine dehydrogenase-like oxidoreductase	-0.615317
FARSB	Q9NSD9	Phenylalanine--tRNA ligase beta subunit	-0.61032
DHCR24	Q15392	Delta(24)-sterol reductase	-0.609689
TECR	Q9NZ01	Very-long-chain enoyl-CoA reductase	-0.608913
AAMP	Q13685	Angio-associated migratory cell protein	-0.608677
MGLL	Q99685	Monoglyceride lipase	-0.607421
PPT1	P50897	Palmitoyl-protein thioesterase 1	-0.605647
COX5A	P20674	Cytochrome c oxidase subunit 5A, mitochondrial	-0.60131
FARSA	Q9Y285	Phenylalanine--tRNA ligase alpha subunit	-0.597525
CTSB	P07858	Cathepsin B	-0.595407
TNPO2	O14787	Transportin-2	-0.594519
BCAT2	O15382	Branched-chain-amino-acid aminotransferase, mitochondrial	-0.592859
PSIP1	O75475	PC4 and SFRS1-interacting protein	-0.591813
SNRPG	P62308	Small nuclear ribonucleoprotein G	-0.588941
PDHB	P11177	Pyruvate dehydrogenase E1 component subunit beta, mitochondrial	-0.588285
MRPL39	Q9NYK5	39S ribosomal protein L39, mitochondrial	-0.587465
ITGAV	P06756	Integrin alpha-V	-0.58687
TIAL1	Q01085	Nucleolysin TIAR	-0.576352
SORT1	Q99523	Sortilin	-0.570834
IPO4	Q8TEX9	Importin-4	-0.564353
MRPL38	Q96DV4	39S ribosomal protein L38, mitochondrial	-0.561686
TMCO1	Q9UM00	Transmembrane and coiled-coil domain-containing protein 1	-0.560895
PDHA1	P08559	Pyruvate dehydrogenase E1 component subunit alpha, somatic form, mitochondrial	-0.559895
PYGB	P11216	Glycogen phosphorylase, brain form	-0.558203
RBM25	P49756	RNA-binding protein 25	-0.556192
CRABP1	P29762	Cellular retinoic acid-binding protein 1	-0.552746
PTGES	O14684	Prostaglandin E synthase	-0.548609
PARD6B	Q9BYG5	Partitioning defective 6 homolog beta	-0.547324
VDAC2	P45880	Voltage-dependent anion-selective channel protein 2	-0.542823
HPRT1	P00492	Hypoxanthine-guanine phosphoribosyltransferase	-0.541854
RRP12	Q5JTH9	RRP12-like protein	-0.540762
HIST1H1E	P10412	Histone H1.4	-0.539626
CPOX	P36551	Oxygen-dependent coproporphyrinogen-III oxidase, mitochondrial	-0.537339
ITGB1	P05556	Integrin beta-1	-0.535905
PEF1	Q9UBV8	Peflin	-0.535757
AIMP2	Q13155	Aminoacyl tRNA synthase complex-interacting multifunctional protein 2	-0.534295
UGP2	Q16851	UTP--glucose-1-phosphate uridylyltransferase	-0.534294
G3BP1	Q13283	Ras GTPase-activating protein-binding protein 1	-0.529412
EEF1B2	P24534	Elongation factor 1-beta	-0.520862
RUVBL2	Q9Y230	RuvB-like 2	-0.52071
SUB1	P53999	Activated RNA polymerase II transcriptional coactivator p15	-0.518339
MGEA5	O60502	Protein O-GlcNAcase	-0.510298
SOD2	P04179	Superoxide dismutase [Mn], mitochondrial	-0.509975
TTC1	Q99614	Tetratricopeptide repeat protein 1	-0.507924
ABCF2	Q9UG63	ATP-binding cassette sub-family F member 2	-0.502734
PSMD2	Q13200	26S proteasome non-ATPase regulatory subunit 2	-0.500899
DDX21	Q9NR30	Nucleolar RNA helicase 2	-0.500171
CYCS	P99999	Cytochrome c	-0.496807
PFN2	P35080	Profilin-2	-0.495496
SQLE	Q14534	Squalene monooxygenase	-0.495489
RPL27A	P46776	60S ribosomal protein L27a	-0.49402
DNAJB12	Q9NXW2	DnaJ homolog subfamily B member 12	-0.492795
CYP51A1	Q16850	Lanosterol 14-alpha demethylase	-0.488221
SEC11A	P67812	Signal peptidase complex catalytic subunit SEC11A	-0.485888
ITGA3	P26006	Integrin alpha-3	-0.481744
SMC3	Q9UQE7	Structural maintenance of chromosomes protein 3	-0.480692
MCM5	P33992	DNA replication licensing factor MCM5	-0.476839
GBA	P04062	Glucosylceramidase	-0.475481
EIF2A	Q9BY44	Eukaryotic translation initiation factor 2A	-0.475288
EIF2AK2	P19525	Interferon-induced, double-stranded RNA-activated protein kinase	-0.472409
NSF	P46459	Vesicle-fusing ATPase	-0.466152
UFD1L	Q92890	Ubiquitin fusion degradation protein 1 homolog	-0.465946
GLA	P06280	Alpha-galactosidase A	-0.464681
ERO1L	Q96HE7	ERO1-like protein alpha	-0.454276
DDX1	Q92499	ATP-dependent RNA helicase DDX1	-0.452255
UBLCP1	Q8WVY7	Ubiquitin-like domain-containing CTD phosphatase 1	-0.4445
PNP	P00491	Purine nucleoside phosphorylase	-0.438888
DHCR7	Q9UBM7	7-dehydrocholesterol reductase	-0.434354
ANXA7	P20073	Annexin A7	-0.433474
NTMT1	Q9BV86	N-terminal Xaa-Pro-Lys N-methyltransferase 1	-0.430981
SEPT7	Q16181	Septin-7	-0.423909
PCYT1A	P49585	Choline-phosphate cytidylyltransferase A	-0.416471
DNMT1	P26358	DNA (cytosine-5)-methyltransferase 1	-0.415108
GSPT1	P15170	Eukaryotic peptide chain release factor GTP-binding subunit ERF3A	-0.412127
RCC2	Q9P258	Protein RCC2	-0.410674
UBE4A	Q14139	Ubiquitin conjugation factor E4 A	-0.3941
MYBBP1A	Q9BQG0	Myb-binding protein 1A	-0.390245
RPN1	P04843	Dolichyl-diphosphooligosaccharide--protein glycosyltransferase subunit 1	-0.383579
PRKDC	P78527	DNA-dependent protein kinase catalytic subunit	-0.379461
PSMB1	P20618	Proteasome subunit beta type-1	-0.367305
ME1	P48163	NADP-dependent malic enzyme	-0.363296
GCN1L1	Q92616	Translational activator GCN1	0.407647
RPS12	P25398	40S ribosomal protein S12	0.409472
RPS7	P62081	40S ribosomal protein S7	0.418804
GSR	P00390	Glutathione reductase, mitochondrial	0.428125
CPT1A	P50416	Carnitine O-palmitoyltransferase 1, liver isoform	0.431167
ACAT1	P24752	Acetyl-CoA acetyltransferase, mitochondrial	0.435145
SERPINB6	P35237	Serpin B6	0.437269
FBP1	P09467	Fructose-1,6-bisphosphatase 1	0.443539
GNB1	P62873	Guanine nucleotide-binding protein G(I)/G(S)/G(T) subunit beta-1	0.444036
PSMA6	P60900	Proteasome subunit alpha type-6	0.451071
SRSF3	P84103	Serine/arginine-rich splicing factor 3	0.452609
RPL35A	P18077	60S ribosomal protein L35a	0.460018
DHRS4	Q9BTZ2	Dehydrogenase/reductase SDR family member 4	0.466071
PDCD6	O75340	Programmed cell death protein 6	0.467216
ACTB	P60709	Actin, cytoplasmic 1	0.468645
PCYOX1	Q9UHG3	Prenylcysteine oxidase 1	0.469069
MTHFD1	P11586	C-1-tetrahydrofolate synthase, cytoplasmic	0.469658
PLEC	Q15149	Plectin	0.47079
FTSJ3	Q8IY81	pre-rRNA processing protein FTSJ3	0.471133
IDH1	O75874	Isocitrate dehydrogenase [NADP] cytoplasmic	0.47505
EZR	P15311	Ezrin	0.484597
NAGK	Q9UJ70	N-acetyl-D-glucosamine kinase	0.48502
CBX3	Q13185	Chromobox protein homolog 3	0.487717
PRKCSH	P14314	Glucosidase 2 subunit beta	0.488142
CBX1	P83916	Chromobox protein homolog 1	0.488574
RPS3A	P61247	40S ribosomal protein S3a	0.490488
TAGLN2	P37802	Transgelin-2	0.498568
PSMD14	O00487	26S proteasome non-ATPase regulatory subunit 14	0.499879
AARS	P49588	Alanine--tRNA ligase, cytoplasmic	0.501478
MYO6	Q9UM54	Unconventional myosin-VI	0.506886
RPS23	P62266	40S ribosomal protein S23	0.513144
KHSRP	Q92945	Far upstream element-binding protein 2	0.517267
STARD10	Q9Y365	PCTP-like protein	0.5189
TPM4	P67936	Tropomyosin alpha-4 chain	0.521266
PPM1G	O15355	Protein phosphatase 1G	0.522096
RANGAP1	P46060	Ran GTPase-activating protein 1	0.530449
SULT2B1	O00204	Sulfotransferase family cytosolic 2B member 1	0.53452
PHB	P35232	Prohibitin	0.539189
SLC3A2	P08195	4F2 cell-surface antigen heavy chain	0.541695
NUCB2	P80303	Nucleobindin-2	0.550061
SLC9A3R1	O14745	Na(+)/H(+) exchange regulatory cofactor NHE-RF1	0.567814
ECI1	P42126	Enoyl-CoA delta isomerase 1, mitochondrial	0.573217
TMED7	Q9Y3B3	Transmembrane emp24 domain-containing protein 7	0.575981
RPS17	P08708	40S ribosomal protein S17	0.579902
NQO1	P15559	NAD(P)H dehydrogenase [quinone] 1	0.583699
RRM2	P31350	Ribonucleoside-diphosphate reductase subunit M2	0.58989
RPL11	P62913	60S ribosomal protein L11	0.592947
RPL18	Q07020	60S ribosomal protein L18	0.594578
PIGK	Q92643	GPI-anchor transamidase	0.595824
NONO	Q15233	Non-POU domain-containing octamer-binding protein	0.60192
RCN2	Q14257	Reticulocalbin-2	0.606061
ABCG2	Q9UNQ0	ATP-binding cassette sub-family G member 2	0.606762
RAB32	Q13637	Ras-related protein Rab-32	0.614705
CKAP4	Q07065	Cytoskeleton-associated protein 4	0.615727
RPS11	P62280	40S ribosomal protein S11	0.623208
PFDN2	Q9UHV9	Prefoldin subunit 2	0.625068
PPP1CA	P62136	Serine/threonine-protein phosphatase PP1-alpha catalytic subunit	0.633346
GATD3A	P0DPI2	Glutamine amidotransferase-like class 1 domain-containing protein 3A, mitochondrial	0.633598
ATP5I	P56385	ATP synthase subunit e, mitochondrial	0.633932
PPIL1	Q9Y3C6	Peptidyl-prolyl cis-trans isomerase-like 1	0.640426
ADSS	P30520	Adenylosuccinate synthetase isozyme 2	0.641903
S100A16	Q96FQ6	Protein S100-A16	0.650647
TLN1	Q9Y490	Talin-1	0.651268
GLO1	Q04760	Lactoylglutathione lyase	0.651808
RPS9	P46781	40S ribosomal protein S9	0.653853
LUC7L3	O95232	Luc7-like protein 3	0.656062
HINT1	P49773	Histidine triad nucleotide-binding protein 1	0.66375
LMCD1	Q9NZU5	LIM and cysteine-rich domains protein 1	0.664816
TUBB4B	P68371	Tubulin beta-4B chain	0.66874
CD9	P21926	CD9 antigen	0.670558
ABI1	Q8IZP0	Abl interactor 1	0.672249
SPR	P35270	Sepiapterin reductase	0.674179
EIF4E	P06730	Eukaryotic translation initiation factor 4E	0.675372
MRPL12	P52815	39S ribosomal protein L12, mitochondrial	0.676133
EIF1AX	P47813	Eukaryotic translation initiation factor 1A, X-chromosomal	0.678739
ATP2A3	Q93084	Sarcoplasmic/endoplasmic reticulum calcium ATPase 3	0.678978
YWHAG	P61981	14-3-3 protein gamma	0.682949
SFN	P31947	14-3-3 protein sigma	0.683525
TMED4	Q7Z7H5	Transmembrane emp24 domain-containing protein 4	0.687915
PSMB6	P28072	Proteasome subunit beta type-6	0.690488
CLU	P10909	Clusterin	0.708165
UBE2V1	Q13404	Ubiquitin-conjugating enzyme E2 variant 1	0.708895
PLIN3	O60664	Perilipin-3	0.709497
HIP1R	O75146	Huntingtin-interacting protein 1-related protein	0.711427
GMFB	P60983	Glia maturation factor beta	0.716524
NUCB1	Q02818	Nucleobindin-1	0.734481
EMC7	Q9NPA0	ER membrane protein complex subunit 7	0.740317
GMDS	O60547	GDP-mannose 4,6 dehydratase	0.745462
ARRB1	P49407	Beta-arrestin-1	0.753593
ERLIN2	O94905	Erlin-2	0.754419
PLRG1	O43660	Pleiotropic regulator 1	0.754643
LMNA	P02545	Prelamin-A/C	0.756422
CALM2	P0DP24	Calmodulin-2	0.766393
STMN1	P16949	Stathmin	0.782656
TMED9	Q9BVK6	Transmembrane emp24 domain-containing protein 9	0.784324
SNX3	O60493	Sorting nexin-3	0.784977
CRABP2	P29373	Cellular retinoic acid-binding protein 2	0.805361
RBM8A	Q9Y5S9	RNA-binding protein 8A	0.821208
SRSF6	Q13247	Serine/arginine-rich splicing factor 6	0.843011
USO1	O60763	General vesicular transport factor p115	0.845705
HDLBP	Q00341	Vigilin	0.848163
CAB39	Q9Y376	Calcium-binding protein 39	0.853968
RALB	P11234	Ras-related protein Ral-B	0.85596
HSPD1	P10809	60 kDa heat shock protein, mitochondrial	0.882807
CARM1	Q86X55	Histone-arginine methyltransferase CARM1	0.886365
FAM50A	Q14320	Protein FAM50A	0.895813
RPL24	P83731	60S ribosomal protein L24	0.911532
LXN	Q9BS40	Latexin	0.911976
EWSR1	Q01844	RNA-binding protein EWS	0.927696
TUBB	P07437	Tubulin beta chain	0.994236
SPTBN2	O15020	Spectrin beta chain, non-erythrocytic 2	1.00857
HSPB1	P04792	Heat shock protein beta-1	1.02721
PRKAR1A	P10644	cAMP-dependent protein kinase type I-alpha regulatory subunit	1.0522
PKM	P14618	Pyruvate kinase PKM	1.08012
CCAR2	Q8N163	Cell cycle and apoptosis regulator protein 2	1.09364
BPNT1	O95861	3(2),5-bisphosphate nucleotidase 1	1.10285
CALU	O43852	Calumenin	1.11596
MAOB	P27338	Amine oxidase [flavin-containing] B	1.13157
RPS6	P62753	40S ribosomal protein S6	1.14285
TIMM44	O43615	Mitochondrial import inner membrane translocase subunit TIM44	1.18051
EEF1D	P29692	Elongation factor 1-delta	1.22466
RTN3	O95197	Reticulon-3	1.23614
MYO5A	Q9Y4I1	Unconventional myosin-Va	1.24578
PLS3	P13797	Plastin-3	1.26926
RPLP2	P05387	60S acidic ribosomal protein P2	1.29512
HEATR6	Q6AI08	HEAT repeat-containing protein 6	1.33224
ACTC1	P68032	Actin, alpha cardiac muscle 1	1.36081
PDCD5	O14737	Programmed cell death protein 5	1.37506
HIST1H4A	P62805	Histone H4	1.39147
SRSF7	Q16629	Serine/arginine-rich splicing factor 7	1.4487
UFM1	P61960	Ubiquitin-fold modifier 1	1.58186
H3F3B	P84243	Histone H3.3	1.60499
RAB39A	Q14964	Ras-related protein Rab-39A	1.60755
DKFZp686J1372	Q5HYB6	Epididymis luminal protein 189	1.66292
TMED1	Q13445	Transmembrane emp24 domain-containing protein 1	1.79356
PACSIN3	Q9UKS6	Protein kinase C and casein kinase substrate in neurons protein 3	1.8066
COG2	Q14746	Conserved oligomeric Golgi complex subunit 2	1.84426
CHCHD3	Q9NX63	MICOS complex subunit MIC19	1.93161

## Sheet: H2O2
Supplementary Table 3. List of the differentially regulated proteins in the NGB-KO+H2O2 vs Neg+H2O2 proteome
Gene names	Protein IDs	Protein names	Difference
DYNC1I2	Q13409	Cytoplasmic dynein 1 intermediate chain 2	-2.21668
H1F0	P07305	Histone H1.0	-2.20289
TOR1B	O14657	Torsin-1B	-1.90733
SMPDL3B	Q92485	Acid sphingomyelinase-like phosphodiesterase 3b	-1.82822
SEC61B	P60468	Protein transport protein Sec61 subunit beta	-1.7297
FABP5	Q01469	Fatty acid-binding protein, epidermal	-1.65976
ITGA2	P17301	Integrin alpha-2	-1.65115
DEK	P35659	Protein DEK	-1.6511
PLOD2	O00469	Procollagen-lysine,2-oxoglutarate 5-dioxygenase 2	-1.60496
RPL32	P62910	60S ribosomal protein L32	-1.59196
MANF	P55145	Mesencephalic astrocyte-derived neurotrophic factor	-1.54529
RPL28	P46779	60S ribosomal protein L28	-1.45502
BASP1	P80723	Brain acid soluble protein 1	-1.44682
RPL29	P47914	60S ribosomal protein L29	-1.41933
TPM3	P06753	Tropomyosin alpha-3 chain	-1.41855
STAU1	O95793	Double-stranded RNA-binding protein Staufen homolog 1	-1.39962
H1FX	Q92522	Histone H1x	-1.39687
RPS14	P62263	40S ribosomal protein S14	-1.39399
CD47	Q08722	Leukocyte surface antigen CD47	-1.3897
HMGB2	P26583	High mobility group protein B2	-1.36242
PDIA5	Q14554	Protein disulfide-isomerase A5	-1.35733
SCO1	O75880	Protein SCO1 homolog, mitochondrial	-1.34919
PCK2	Q16822	Phosphoenolpyruvate carboxykinase [GTP], mitochondrial	-1.34106
SOD1	P00441	Superoxide dismutase [Cu-Zn]	-1.32942
HIST1H1B	P16401	Histone H1.5	-1.29417
TPM1	P09493	Tropomyosin alpha-1 chain	-1.27841
ANXA1	P04083	Annexin A1	-1.26616
GHITM	Q9H3K2	Growth hormone-inducible transmembrane protein	-1.24465
HIST1H1E	P10412	Histone H1.4	-1.22221
P4HA2	O15460	Prolyl 4-hydroxylase subunit alpha-2	-1.20366
RPL31	P62899	60S ribosomal protein L31	-1.20361
ATP5O	P48047	ATP synthase subunit O, mitochondrial	-1.19858
HSPA4L	O95757	Heat shock 70 kDa protein 4L	-1.19161
RPL19	P84098	60S ribosomal protein L19	-1.19022
VDAC2	P45880	Voltage-dependent anion-selective channel protein 2	-1.18759
CRABP1	P29762	Cellular retinoic acid-binding protein 1	-1.18307
SLC35B2	Q8TB61	Adenosine 3-phospho 5-phosphosulfate transporter 1	-1.17826
CDV3	Q9UKY7	Protein CDV3 homolog	-1.16918
SUMO1	P63165	Small ubiquitin-related modifier 1	-1.16393
SLC25A5	P05141	ADP/ATP translocase 2	-1.15559
UBL3	O95164	Ubiquitin-like protein 3	-1.13826
PGAM5	Q96HS1	Serine/threonine-protein phosphatase PGAM5, mitochondrial	-1.11336
DYNC1H1	Q14204	Cytoplasmic dynein 1 heavy chain 1	-1.09825
DNAJC13	O75165	DnaJ homolog subfamily C member 13	-1.09083
ITGB1	P05556	Integrin beta-1	-1.06558
EIF2S2	P20042	Eukaryotic translation initiation factor 2 subunit 2	-1.06196
FLNB	O75369	Filamin-B	-1.05975
CSNK2B	P67870	Casein kinase II subunit beta	-1.05891
APEX1	P27695	DNA-(apurinic or apyrimidinic site) lyase	-1.0408
COTL1	Q14019	Coactosin-like protein	-1.0397
TOP2B	Q02880	DNA topoisomerase 2-beta	-1.02806
FTH1	P02794	Ferritin heavy chain	-1.02638
SEL1L	Q9UBV2	Protein sel-1 homolog 1	-1.02567
MAGT1	Q9H0U3	Magnesium transporter protein 1	-1.01503
SLC25A1	P53007	Tricarboxylate transport protein, mitochondrial	-1.01031
MRPS22	P82650	28S ribosomal protein S22, mitochondrial	-0.986187
SCCPDH	Q8NBX0	Saccharopine dehydrogenase-like oxidoreductase	-0.982747
P4HA1	P13674	Prolyl 4-hydroxylase subunit alpha-1	-0.980142
MRRF	Q96E11	Ribosome-recycling factor, mitochondrial	-0.977665
ACAA1	P09110	3-ketoacyl-CoA thiolase, peroxisomal	-0.94995
ANP32A	P39687	Acidic leucine-rich nuclear phosphoprotein 32 family member A	-0.936402
RPS27	P42677	40S ribosomal protein S27	-0.931239
ANXA7	P20073	Annexin A7	-0.930126
DPP7	Q9UHL4	Dipeptidyl peptidase 2	-0.922771
COX4I1	P13073	Cytochrome c oxidase subunit 4 isoform 1, mitochondrial	-0.91596
BCAP31	P51572	B-cell receptor-associated protein 31	-0.910056
IMPDH2	P12268	Inosine-5-monophosphate dehydrogenase 2	-0.907374
PALLD	Q8WX93	Palladin	-0.906422
RPS20	P60866	40S ribosomal protein S20	-0.894341
NDUFB9	Q9Y6M9	NADH dehydrogenase [ubiquinone] 1 beta subcomplex subunit 9	-0.892761
UQCRC1	P31930	Cytochrome b-c1 complex subunit 1, mitochondrial	-0.888157
GMPPB	Q9Y5P6	Mannose-1-phosphate guanyltransferase beta	-0.887483
NOLC1	Q14978	Nucleolar and coiled-body phosphoprotein 1	-0.88262
HMGB3	O15347	High mobility group protein B3	-0.879014
RPL7A	P62424	60S ribosomal protein L7a	-0.8769
NOP56	O00567	Nucleolar protein 56	-0.876049
RPL8	P62917	60S ribosomal protein L8	-0.875892
YBX3	P16989	Y-box-binding protein 3	-0.870568
DTD1	Q8TEA8	D-aminoacyl-tRNA deacylase 1	-0.866393
IMMT	Q16891	MICOS complex subunit MIC60	-0.862944
ECE1	P42892	Endothelin-converting enzyme 1	-0.861465
MOV10	Q9HCE1	Putative helicase MOV-10	-0.853639
TPM1	P09493	Tropomyosin alpha-1 chain	-0.846341
UBTF	P17480	Nucleolar transcription factor 1	-0.844685
RPS19	P39019	40S ribosomal protein S19	-0.843755
GSTZ1	O43708	Maleylacetoacetate isomerase	-0.83759
RPS3A	P61247	40S ribosomal protein S3a	-0.820348
EIF2S3	P41091	Eukaryotic translation initiation factor 2 subunit 3	-0.814395
EMC8	O43402	ER membrane protein complex subunit 8	-0.811001
SLC35E1	Q96K37	Solute carrier family 35 member E1	-0.808164
TTC1	Q99614	Tetratricopeptide repeat protein 1	-0.79112
PRKCD	Q05655	Protein kinase C delta type	-0.788952
PARD6B	Q9BYG5	Partitioning defective 6 homolog beta	-0.782545
STOM	P27105	Erythrocyte band 7 integral membrane protein	-0.781294
ALDH5A1	P51649	Succinate-semialdehyde dehydrogenase, mitochondrial	-0.778039
RAP2C	Q9Y3L5	Ras-related protein Rap-2c	-0.776955
CYB5A	P00167	Cytochrome b5	-0.771521
BLMH	Q13867	Bleomycin hydrolase	-0.769027
SCAMP3	O14828	Secretory carrier-associated membrane protein 3	-0.768335
SEC62	Q99442	Translocation protein SEC62	-0.766222
SH3BGRL	O75368	SH3 domain-binding glutamic acid-rich-like protein	-0.762323
PDIA6	Q15084	Protein disulfide-isomerase A6	-0.757386
EIF3J	O75822	Eukaryotic translation initiation factor 3 subunit J	-0.754979
ECH1	Q13011	Delta(3,5)-Delta(2,4)-dienoyl-CoA isomerase, mitochondrial	-0.753199
AK4	P27144	Adenylate kinase 4, mitochondrial	-0.751012
CORO7	P57737	Coronin-7	-0.750888
SLC25A3	Q00325	Phosphate carrier protein, mitochondrial	-0.749755
RPL27A	P46776	60S ribosomal protein L27a	-0.749148
SCP2	P22307	Non-specific lipid-transfer protein	-0.748207
SPTLC1	O15269	Serine palmitoyltransferase 1	-0.744809
PIEZO1	Q92508	Piezo-type mechanosensitive ion channel component 1	-0.740938
SAMM50	Q9Y512	Sorting and assembly machinery component 50 homolog	-0.73586
PAWR	Q96IZ0	PRKC apoptosis WT1 regulator protein	-0.735662
CGN	Q9P2M7	Cingulin	-0.732404
SEC61A1	P61619	Protein transport protein Sec61 subunit alpha isoform 1	-0.727329
GRPEL1	Q9HAV7	GrpE protein homolog 1, mitochondrial	-0.707887
CLIC4	Q9Y696	Chloride intracellular channel protein 4	-0.702353
DDX17	Q92841	Probable ATP-dependent RNA helicase DDX17	-0.700053
ATP5L	O75964	ATP synthase subunit g, mitochondrial	-0.692367
TMPO	P42167	Lamina-associated polypeptide 2, isoforms beta/gamma	-0.691324
KTN1	Q86UP2	Kinectin	-0.681623
SNRPD2	P62316	Small nuclear ribonucleoprotein Sm D2	-0.673985
GOT2	P00505	Aspartate aminotransferase, mitochondrial	-0.664415
EIF3K	Q9UBQ5	Eukaryotic translation initiation factor 3 subunit K	-0.664278
SLC1A5	Q15758	Neutral amino acid transporter B(0)	-0.663826
EEF1B2	P24534	Elongation factor 1-beta	-0.660261
SDHA	P31040	Succinate dehydrogenase [ubiquinone] flavoprotein subunit, mitochondrial	-0.65212
MCCC2	Q9HCC0	Methylcrotonoyl-CoA carboxylase beta chain, mitochondrial	-0.646486
POLR2H	P52434	DNA-directed RNA polymerases I, II, and III subunit RPABC3	-0.642243
PLAA	Q9Y263	Phospholipase A-2-activating protein	-0.638858
ATP1A1	P05023	Sodium/potassium-transporting ATPase subunit alpha-1	-0.638299
ITGA3	P26006	Integrin alpha-3	-0.637798
ATP1B3	P54709	Sodium/potassium-transporting ATPase subunit beta-3	-0.63664
UQCRC2	P22695	Cytochrome b-c1 complex subunit 2, mitochondrial	-0.636017
SUB1	P53999	Activated RNA polymerase II transcriptional coactivator p15	-0.635947
HDAC2	Q92769	Histone deacetylase 2	-0.634567
CAT	P04040	Catalase	-0.633418
ATP5F1	P24539	ATP synthase F(0) complex subunit B1, mitochondrial	-0.628196
SUGT1	Q9Y2Z0	Suppressor of G2 allele of SKP1 homolog	-0.627072
LUC7L2	Q9Y383	Putative RNA-binding protein Luc7-like 2	-0.625292
PHB2	Q99623	Prohibitin-2	-0.620385
SET	Q01105	Protein SET	-0.620302
APEH	P13798	Acylamino-acid-releasing enzyme	-0.618292
NPC1	O15118	Niemann-Pick C1 protein	-0.617496
YWHAH	Q04917	14-3-3 protein eta	-0.606395
ANXA11	P50995	Annexin A11	-0.604496
KIAA1324	Q6UXG2	UPF0577 protein KIAA1324	-0.604286
PLS1	Q14651	Plastin-1	-0.598428
DHODH	Q02127	Dihydroorotate dehydrogenase (quinone), mitochondrial	-0.594894
TFG	Q92734	Protein TFG	-0.591166
COX5B	P10606	Cytochrome c oxidase subunit 5B, mitochondrial	-0.584747
MRPL38	Q96DV4	39S ribosomal protein L38, mitochondrial	-0.583065
MRPS36	P82909	28S ribosomal protein S36, mitochondrial	-0.576516
ACTN1	P12814	Alpha-actinin-1	-0.574152
CDC37	Q16543	Hsp90 co-chaperone Cdc37	-0.565729
MYH14	Q7Z406	Myosin-14	-0.561424
RRBP1	Q9P2E9	Ribosome-binding protein 1	-0.554018
PNPO	Q9NVS9	Pyridoxine-5-phosphate oxidase	-0.552603
CKMT1A	P12532	Creatine kinase U-type, mitochondrial	-0.548809
SLC25A6	P12236	ADP/ATP translocase 3	-0.548192
S100A13	Q99584	Protein S100-A13	-0.54724
ILF3	Q12906	Interleukin enhancer-binding factor 3	-0.54596
CTSD	P07339	Cathepsin D	-0.540735
TMEM165	Q9HC07	Transmembrane protein 165	-0.539855
TOMM70A	O94826	Mitochondrial import receptor subunit TOM70	-0.538092
HSPE1	P61604	10 kDa heat shock protein, mitochondrial	-0.537824
USMG5	Q96IX5	Up-regulated during skeletal muscle growth protein 5	-0.537416
PLOD3	O60568	Procollagen-lysine,2-oxoglutarate 5-dioxygenase 3	-0.535661
TMX1	Q9H3N1	Thioredoxin-related transmembrane protein 1	-0.535635
RTCB	Q9Y3I0	tRNA-splicing ligase RtcB homolog	-0.53263
DCTN1	Q14203	Dynactin subunit 1	-0.531729
PPIB	P23284	Peptidyl-prolyl cis-trans isomerase B	-0.523282
PSMD2	Q13200	26S proteasome non-ATPase regulatory subunit 2	-0.522841
RPLP0	P05388	60S acidic ribosomal protein P0	-0.516016
GLRX3	O76003	Glutaredoxin-3	-0.5157
CYCS	P99999	Cytochrome c	-0.511992
HK1	P19367	Hexokinase-1	-0.510885
SEPT8	Q92599	Septin-8	-0.501995
NUP210	Q8TEM1	Nuclear pore membrane glycoprotein 210	-0.501498
ALYREF	Q86V81	THO complex subunit 4	-0.500284
WARS	P23381	Tryptophan--tRNA ligase, cytoplasmic	-0.497039
DCXR	Q7Z4W1	L-xylulose reductase	-0.494803
SEPT7	Q16181	Septin-7	-0.490057
BCAT2	O15382	Branched-chain-amino-acid aminotransferase, mitochondrial	-0.489858
EIF4B	P23588	Eukaryotic translation initiation factor 4B	-0.489387
NCEH1	Q6PIU2	Neutral cholesterol ester hydrolase 1	-0.488174
UGP2	Q16851	UTP--glucose-1-phosphate uridylyltransferase	-0.485688
PARK7	Q99497	Protein deglycase DJ-1	-0.48194
CYC1	P08574	Cytochrome c1, heme protein, mitochondrial	-0.48149
GSN	P06396	Gelsolin	-0.479549
RPS27A	P62979	Ubiquitin-40S ribosomal protein S27a	-0.479109
TFRC	P02786	Transferrin receptor protein 1	-0.464199
HYOU1	Q9Y4L1	Hypoxia up-regulated protein 1	-0.461061
ACAD9	Q9H845	Acyl-CoA dehydrogenase family member 9, mitochondrial	-0.460912
F11R	Q9Y624	Junctional adhesion molecule A	-0.459562
AHSA1	O95433	Activator of 90 kDa heat shock protein ATPase homolog 1	-0.456497
FLNA	P21333	Filamin-A	-0.453156
LAMP1	P11279	Lysosome-associated membrane glycoprotein 1	-0.445493
GLUD1	P00367	Glutamate dehydrogenase 1, mitochondrial	-0.433446
SLC25A4	P12235	ADP/ATP translocase 1	-0.425229
MDH2	P40926	Malate dehydrogenase, mitochondrial	-0.42483
VAPA	Q9P0L0	Vesicle-associated membrane protein-associated protein A	-0.406635
HADHB	P55084	Trifunctional enzyme subunit beta, mitochondrial	-0.405522
PRMT5	O14744	Protein arginine N-methyltransferase 5	-0.388029
DDB1	Q16531	DNA damage-binding protein 1	0.351744
NUDT5	Q9UKK9	ADP-sugar pyrophosphatase	0.372923
NIPSNAP1	Q9BPW8	Protein NipSnap homolog 1	0.391791
XRCC6	P12956	X-ray repair cross-complementing protein 6	0.403398
ABCE1	P61221	ATP-binding cassette sub-family E member 1	0.418339
EIF3I	Q13347	Eukaryotic translation initiation factor 3 subunit I	0.421729
CCT2	P78371	T-complex protein 1 subunit beta	0.423999
DIAPH1	O60610	Protein diaphanous homolog 1	0.42908
API5	Q9BZZ5	Apoptosis inhibitor 5	0.437746
SEC31A	O94979	Protein transport protein Sec31A	0.446943
MDH1	P40925	Malate dehydrogenase, cytoplasmic	0.447981
UNC45A	Q9H3U1	Protein unc-45 homolog A	0.448836
CCT3	P49368	T-complex protein 1 subunit gamma	0.461243
PPP2CA	P67775	Serine/threonine-protein phosphatase 2A catalytic subunit alpha isoform	0.46257
PEBP1	P30086	Phosphatidylethanolamine-binding protein 1	0.466341
AARS	P49588	Alanine--tRNA ligase, cytoplasmic	0.473069
ARMT1	Q9H993	Protein-glutamate O-methyltransferase	0.473926
GDI1	P31150	Rab GDP dissociation inhibitor alpha	0.480749
SRM	P19623	Spermidine synthase	0.483318
DDX42	Q86XP3	ATP-dependent RNA helicase DDX42	0.48593
GNB2L1	P63244	Guanine nucleotide-binding protein subunit beta-2-like 1	0.490552
SMC2	O95347	Structural maintenance of chromosomes protein 2	0.491788
IARS	P41252	Isoleucine--tRNA ligase, cytoplasmic	0.493114
EFHD2	Q96C19	EF-hand domain-containing protein D2	0.493804
ERH	P84090	Enhancer of rudimentary homolog	0.496957
RAB2A	P61019	Ras-related protein Rab-2A	0.497578
WDR1	O75083	WD repeat-containing protein 1	0.498791
EPB41L5	Q9HCM4	Band 4.1-like protein 5	0.501287
RNPEP	Q9H4A4	Aminopeptidase B	0.515032
SEC23B	Q15437	Protein transport protein Sec23B	0.51762
ACBD3	Q9H3P7	Golgi resident protein GCP60	0.517677
GFPT1	Q06210	Glutamine--fructose-6-phosphate aminotransferase [isomerizing] 1	0.517799
NUDT1	P36639	7,8-dihydro-8-oxoguanine triphosphatase	0.525319
MTA3	Q9BTC8	Metastasis-associated protein MTA3	0.531072
CLINT1	Q14677	Clathrin interactor 1	0.53132
EIF4A1	P60842	Eukaryotic initiation factor 4A-I	0.532465
KPNA3	O00505	Importin subunit alpha-4	0.533978
TBCE	Q15813	Tubulin-specific chaperone E	0.543983
UBA6	A0AVT1	Ubiquitin-like modifier-activating enzyme 6	0.548817
NASP	P49321	Nuclear autoantigenic sperm protein	0.552165
MARS	P56192	Methionine--tRNA ligase, cytoplasmic	0.554822
CAPN1	P07384	Calpain-1 catalytic subunit	0.554829
NME1-NME2	Q32Q12	Nucleoside diphosphate kinase	0.556435
PAFAH1B3	Q15102	Platelet-activating factor acetylhydrolase IB subunit gamma	0.557164
PRMT1	Q99873	Protein arginine N-methyltransferase 1	0.557913
ERAP1	Q9NZ08	Endoplasmic reticulum aminopeptidase 1	0.559559
KPNB1	Q14974	Importin subunit beta-1	0.560776
NUTF2	P61970	Nuclear transport factor 2	0.561646
XPOT	O43592	Exportin-T	0.565392
FBP1	P09467	Fructose-1,6-bisphosphatase 1	0.569071
FAM49B	Q9NUQ9	Protein FAM49B	0.570341
YKT6	O15498	Synaptobrevin homolog YKT6	0.573599
PRPS2	P11908	Ribose-phosphate pyrophosphokinase 2	0.577663
AGR2	O95994	Anterior gradient protein 2 homolog	0.578856
NUDT15	Q9NV35	Probable 8-oxo-dGTP diphosphatase NUDT15	0.580908
GCN1L1	Q92616	Translational activator GCN1	0.582797
TJP2	Q9UDY2	Tight junction protein ZO-2	0.584111
RPRD1B	Q9NQG5	Regulation of nuclear pre-mRNA domain-containing protein 1B	0.585766
SAR1A	Q9NR31	GTP-binding protein SAR1a	0.585789
NAA25	Q14CX7	N-alpha-acetyltransferase 25, NatB auxiliary subunit	0.597368
NARS	O43776	Asparagine--tRNA ligase, cytoplasmic	0.602956
SDF2	Q99470	Stromal cell-derived factor 2	0.603837
KPNA6	O60684	Importin subunit alpha-7	0.605341
GNB1	P62873	Guanine nucleotide-binding protein G(I)/G(S)/G(T) subunit beta-1	0.607606
DHX15	O43143	Pre-mRNA-splicing factor ATP-dependent RNA helicase DHX15	0.608129
WDR82	Q6UXN9	WD repeat-containing protein 82	0.612462
TMED1	Q13445	Transmembrane emp24 domain-containing protein 1	0.616788
SAR1B	Q9Y6B6	GTP-binding protein SAR1b	0.619387
RPA1	P27694	Replication protein A 70 kDa DNA-binding subunit	0.620131
EML4	Q9HC35	Echinoderm microtubule-associated protein-like 4	0.625937
CNOT1	A5YKK6	CCR4-NOT transcription complex subunit 1	0.62648
CSE1L	P55060	Exportin-2	0.628214
TTC9C	Q8N5M4	Tetratricopeptide repeat protein 9C	0.631467
SNRPG	Q49AN9	Small nuclear ribonucleoprotein G	0.636463
XPO1	O14980	Exportin-1	0.639109
TUBB4B	P68371	Tubulin beta-4B chain	0.641208
CCT4	P50991	T-complex protein 1 subunit delta	0.641771
PRKDC	P78527	DNA-dependent protein kinase catalytic subunit	0.642682
SPCS3	P61009	Signal peptidase complex subunit 3	0.644112
PREP	P48147	Prolyl endopeptidase	0.644868
TMED2	Q15363	Transmembrane emp24 domain-containing protein 2	0.654399
CSK	P41240	Tyrosine-protein kinase CSK	0.657465
TUBB	P07437	Tubulin beta chain	0.658434
PTGR2	Q8N8N7	Prostaglandin reductase 2	0.661832
MAPK3	P27361	Mitogen-activated protein kinase 3	0.663048
SMS	P52788	Spermine synthase	0.664418
VPS26A	O75436	Vacuolar protein sorting-associated protein 26A	0.666245
ASNS	P08243	Asparagine synthetase [glutamine-hydrolyzing]	0.666731
SULT2B1	O00204	Sulfotransferase family cytosolic 2B member 1	0.676864
MYL6	P60660	Myosin light polypeptide 6	0.677107
PHPT1	Q9NRX4	14 kDa phosphohistidine phosphatase	0.677535
NEDD8	Q15843	NEDD8	0.678077
GAN	Q9H2C0	Gigaxonin	0.6968
AP2S1	P53680	AP-2 complex subunit sigma	0.697728
IPO7	O95373	Importin-7	0.707506
CLTA	P09496	Clathrin light chain A	0.711243
PTBP1	P26599	Polypyrimidine tract-binding protein 1	0.712766
AIMP2	Q13155	Aminoacyl tRNA synthase complex-interacting multifunctional protein 2	0.717085
BAG3	O95817	BAG family molecular chaperone regulator 3	0.721441
AP1G1	O43747	AP-1 complex subunit gamma-1	0.722642
SH3GLB2	Q9NR46	Endophilin-B2	0.723445
ACO1	P21399	Cytoplasmic aconitate hydratase	0.725867
ACAT2	Q9BWD1	Acetyl-CoA acetyltransferase, cytosolic	0.729269
PRKAR1A	P10644	cAMP-dependent protein kinase type I-alpha regulatory subunit	0.739213
GCLC	P48506	Glutamate--cysteine ligase catalytic subunit	0.745895
ARL2	P36404	ADP-ribosylation factor-like protein 2	0.749996
RALB	P11234	Ras-related protein Ral-B	0.751272
TSG101	Q99816	Tumor susceptibility gene 101 protein	0.753246
HIST1H2BN	Q99877	Histone H2B type 1-N	0.757197
L1CAM	P32004	Neural cell adhesion molecule L1	0.75733
CPPED1	Q9BRF8	Serine/threonine-protein phosphatase CPPED1	0.760515
EEF1A1	P68104	Elongation factor 1-alpha 1	0.766026
CDK5RAP3	Q96JB5	CDK5 regulatory subunit-associated protein 3	0.779901
TSN	Q15631	Translin	0.781383
CERS2	Q96G23	Ceramide synthase 2	0.78355
RBM8A	Q9Y5S9	RNA-binding protein 8A	0.789274
SEC24A	O95486	Protein transport protein Sec24A	0.793577
PUS7	Q96PZ0	Pseudouridylate synthase 7 homolog	0.801349
GLO1	Q04760	Lactoylglutathione lyase	0.801434
PEF1	Q9UBV8	Peflin	0.806446
NCBP1	Q09161	Nuclear cap-binding protein subunit 1	0.807818
IDH3A	P50213	Isocitrate dehydrogenase [NAD] subunit alpha, mitochondrial	0.811303
CD9	P21926	CD9 antigen	0.815463
TMTC3	Q6ZXV5	Transmembrane and TPR repeat-containing protein 3	0.818846
EIF1AX	P47813	Eukaryotic translation initiation factor 1A, X-chromosomal	0.826791
ANKFY1	Q9P2R3	Rabankyrin-5	0.828868
CDK4	P11802	Cyclin-dependent kinase 4	0.829261
DHRS4	Q9BTZ2	Dehydrogenase/reductase SDR family member 4	0.830101
WFS1	O76024	Wolframin	0.831947
CAB39	Q9Y376	Calcium-binding protein 39	0.837409
CBX1	P83916	Chromobox protein homolog 1	0.837482
UBQLN1	Q9UMX0	Ubiquilin-1	0.837881
EIF4E	P06730	Eukaryotic translation initiation factor 4E	0.846356
PSMA4	P25789	Proteasome subunit alpha type-4	0.847275
CLTC	Q00610	Clathrin heavy chain 1	0.853899
NUDCD1	Q96RS6	NudC domain-containing protein 1	0.861875
CSTF3	Q12996	Cleavage stimulation factor subunit 3	0.867073
MCM2	P49736	DNA replication licensing factor MCM2	0.876387
ESRP1	Q6NXG1	Epithelial splicing regulatory protein 1	0.877295
COPZ1	P61923	Coatomer subunit zeta-1	0.90201
PPP5C	P53041	Serine/threonine-protein phosphatase 5	0.906017
MBOAT7	Q96N66	Lysophospholipid acyltransferase 7	0.917695
FAM50A	Q14320	Protein FAM50A	0.924767
BCCIP	Q9P287	BRCA2 and CDKN1A-interacting protein	0.942412
LXN	Q9BS40	Latexin	0.949034
MGST1	P10620	Microsomal glutathione S-transferase 1	0.961384
TSR1	Q2NL82	Pre-rRNA-processing protein TSR1 homolog	0.965116
ARL3	P36405	ADP-ribosylation factor-like protein 3	0.984187
OSBPL2	Q9H1P3	Oxysterol-binding protein-related protein 2	0.994603
BUD31	P41223	Protein BUD31 homolog	1.00325
ATG4B	Q9Y4P1	Cysteine protease ATG4B	1.00727
ABCG2	Q9UNQ0	ATP-binding cassette sub-family G member 2	1.01913
ARF6	P62330	ADP-ribosylation factor 6	1.0219
TCP1	P17987	T-complex protein 1 subunit alpha	1.02545
EIF4H	Q15056	Eukaryotic translation initiation factor 4H	1.026
AP3D1	O14617	AP-3 complex subunit delta-1	1.04842
PPP6C	O00743	Serine/threonine-protein phosphatase 6 catalytic subunit	1.05526
HIST1H2AJ	Q99878	Histone H2A type 1-J	1.07036
MAGOHB	Q96A72	Protein mago nashi homolog 2	1.07785
ADSS	P30520	Adenylosuccinate synthetase isozyme 2	1.12149
MYO1D	O94832	Unconventional myosin-Id	1.12241
ACOX3	O15254	Peroxisomal acyl-coenzyme A oxidase 3	1.12587
ACTC1	P68032	Actin, alpha cardiac muscle 1	1.13518
EWSR1	Q01844	RNA-binding protein EWS	1.13644
HINT1	P49773	Histidine triad nucleotide-binding protein 1	1.1566
AP1S1	P61966	AP-1 complex subunit sigma-1A	1.1574
SCRIB	Q14160	Protein scribble homolog	1.16552
U2AF1	Q01081	Splicing factor U2AF 35 kDa subunit	1.16827
IDI1	Q13907	Isopentenyl-diphosphate Delta-isomerase 1	1.17734
DDX39A	O00148	ATP-dependent RNA helicase DDX39A	1.18386
ENOPH1	Q9UHY7	Enolase-phosphatase E1	1.18583
HEATR6	Q6AI08	HEAT repeat-containing protein 6	1.23337
EHD4	Q9H223	EH domain-containing protein 4	1.27733
HIP1R	O75146	Huntingtin-interacting protein 1-related protein	1.31211
ARL1	P40616	ADP-ribosylation factor-like protein 1	1.37055
HIST2H2BE	Q16778	Histone H2B type 2-E	1.39168
TCEB2	Q15370	Transcription elongation factor B polypeptide 2	1.39289
TMED3	Q9Y3Q3	Transmembrane emp24 domain-containing protein 3	1.42774
UFM1	P61960	Ubiquitin-fold modifier 1	1.47785
SNX6	Q9UNH7	Sorting nexin-6	1.54544
TK1	P04183	Thymidine kinase, cytosolic	1.59761
RPLP2	P05387	60S acidic ribosomal protein P2	1.63208
PLS3	P13797	Plastin-3	1.67829
TRA2B	P62995	Transformer-2 protein homolog beta	1.80302
RHOC	P08134	Rho-related GTP-binding protein RhoC	1.8259
LMNA	P02545	Prelamin-A/C	1.83428
DKFZp686J1372	Q5HYB6	Epididymis luminal protein 189	1.84243
HACD2	Q6Y1H2	Very-long-chain (3R)-3-hydroxyacyl-CoA dehydratase 2	1.95055
SYPL1	Q16563	Synaptophysin-like protein 1	2.01056
SRSF7	Q16629	Serine/arginine-rich splicing factor 7	2.17299
AKR1C2	P52895	Aldo-keto reductase family 1 member C2	2.71325

## Sheet: E2 H2O2
Supplementary Table 4. List of the differentially regulated proteins in the NGB-KO+E2+H2O2 vs Neg+E2+H2O2 proteome
Gene names	Protein IDs	Protein names	Difference
FABP5	Q01469	Fatty acid-binding protein, epidermal	-2.53448
GNB2	P62879	Guanine nucleotide-binding protein G(I)/G(S)/G(T) subunit beta-2	-2.36564
SUMO1	P63165	Small ubiquitin-related modifier 1	-2.36411
EPS15L1	Q9UBC2	Epidermal growth factor receptor substrate 15-like 1	-2.33589
DYNC1I2	Q13409	Cytoplasmic dynein 1 intermediate chain 2	-1.90458
PALLD	Q8WX93	Palladin	-1.78603
TPM3	P06753	Tropomyosin alpha-3 chain	-1.61274
PIN4	Q9Y237	Peptidyl-prolyl cis-trans isomerase NIMA-interacting 4	-1.50078
MYO5A	Q9Y4I1	Unconventional myosin-Va	-1.47921
MARCKSL1	P49006	MARCKS-related protein	-1.38858
CDV3	Q9UKY7	Protein CDV3 homolog	-1.36267
RPS27	P42677	40S ribosomal protein S27	-1.31906
PRKCD	Q05655	Protein kinase C delta type	-1.30484
ITGA2	P17301	Integrin alpha-2	-1.29544
TAX1BP3	O14907	Tax1-binding protein 3	-1.2885
MTA1	Q13330	Metastasis-associated protein MTA1	-1.28064
CUL2	Q13617	Cullin-2	-1.26805
DYNLL2	Q96FJ2	Dynein light chain 2, cytoplasmic	-1.24475
UBQLN2	Q9UHD9	Ubiquilin-2	-1.16577
SEC61A1	P61619	Protein transport protein Sec61 subunit alpha isoform 1	-1.16372
RPS27A	P62979	Ubiquitin-40S ribosomal protein S27a	-1.1598
FLNB	O75369	Filamin-B	-1.15835
DYNC1H1	Q14204	Cytoplasmic dynein 1 heavy chain 1	-1.15102
UCHL3	P15374	Ubiquitin carboxyl-terminal hydrolase isozyme L3	-1.14903
TRAPPC3	O43617	Trafficking protein particle complex subunit 3	-1.13535
BASP1	P80723	Brain acid soluble protein 1	-1.11242
UEVLD	Q8IX04	Ubiquitin-conjugating enzyme E2 variant 3	-1.1051
PLOD2	O00469	Procollagen-lysine,2-oxoglutarate 5-dioxygenase 2	-1.09078
WARS	P23381	Tryptophan--tRNA ligase, cytoplasmic	-1.08284
APEH	P13798	Acylamino-acid-releasing enzyme	-1.05285
YBX3	P16989	Y-box-binding protein 3	-1.04269
PLAA	Q9Y263	Phospholipase A-2-activating protein	-1.03783
CBX5	P45973	Chromobox protein homolog 5	-1.0224
S100A13	Q99584	Protein S100-A13	-1.02143
DNMT1	P26358	DNA (cytosine-5)-methyltransferase 1	-1.01793
PDIA5	Q14554	Protein disulfide-isomerase A5	-1.01403
APEX1	P27695	DNA-(apurinic or apyrimidinic site) lyase	-1.01233
GMPPB	Q9Y5P6	Mannose-1-phosphate guanyltransferase beta	-0.996902
ECE1	P42892	Endothelin-converting enzyme 1	-0.993236
UBE2K	P61086	Ubiquitin-conjugating enzyme E2 K	-0.989781
SLC35E1	Q96K37	Solute carrier family 35 member E1	-0.984676
PDCL3	Q9H2J4	Phosducin-like protein 3	-0.970679
MGLL	Q99685	Monoglyceride lipase	-0.966243
EXOC4	Q96A65	Exocyst complex component 4	-0.95834
GHITM	Q9H3K2	Growth hormone-inducible transmembrane protein	-0.95606
PSME3	P61289	Proteasome activator complex subunit 3	-0.951423
ATP6V0D2	Q8N8Y2	V-type proton ATPase subunit d 2	-0.948881
PSMG2	Q969U7	Proteasome assembly chaperone 2	-0.947188
ANP32A	P39687	Acidic leucine-rich nuclear phosphoprotein 32 family member A	-0.946871
POLR2H	P52434	DNA-directed RNA polymerases I, II, and III subunit RPABC3	-0.943021
TPM1	P09493	Tropomyosin alpha-1 chain	-0.941447
MYH10	P35580	Myosin-10	-0.940824
ERLIN1	O75477	Erlin-1	-0.939516
PTGR1	Q14914	Prostaglandin reductase 1	-0.936646
AK4	P27144	Adenylate kinase 4, mitochondrial	-0.923502
AHSA1	O95433	Activator of 90 kDa heat shock protein ATPase homolog 1	-0.922349
RAD23B	P54727	UV excision repair protein RAD23 homolog B	-0.902316
EIF3J	O75822	Eukaryotic translation initiation factor 3 subunit J	-0.899129
DTD1	Q8TEA8	D-tyrosyl-tRNA(Tyr) deacylase 1	-0.899026
CGN	Q9P2M7	Cingulin	-0.892782
CALCOCO2	Q13137	Calcium-binding and coiled-coil domain-containing protein 2	-0.892548
PDE12	Q6L8Q7	2,5-phosphodiesterase 12	-0.890791
UBL3	O95164	Ubiquitin-like protein 3	-0.888684
PSMB7	Q99436	Proteasome subunit beta type-7	-0.885385
YWHAH	Q04917	14-3-3 protein eta	-0.882135
ISG15	P05161	Ubiquitin-like protein ISG15	-0.881725
UBE2I	P63279	SUMO-conjugating enzyme UBC9	-0.880949
SUGT1	Q9Y2Z0	Suppressor of G2 allele of SKP1 homolog	-0.879291
ANXA1	P04083	Annexin A1	-0.875659
NT5DC1	Q5TFE4	5-nucleotidase domain-containing protein 1	-0.870133
NOLC1	Q14978	Nucleolar and coiled-body phosphoprotein 1	-0.868171
HMGCS1	Q01581	Hydroxymethylglutaryl-CoA synthase, cytoplasmic	-0.863389
HSPA4L	O95757	Heat shock 70 kDa protein 4L	-0.853675
RPS21	P63220	40S ribosomal protein S21	-0.848791
TWF2	Q6IBS0	Twinfilin-2	-0.848481
NOP56	O00567	Nucleolar protein 56	-0.841976
RAP2C	Q9Y3L5	Ras-related protein Rap-2c	-0.835927
S100A10	P60903	Protein S100-A10	-0.834209
ANK3	Q12955	Ankyrin-3	-0.820576
ADSL	P30566	Adenylosuccinate lyase	-0.814573
PSMG1	O95456	Proteasome assembly chaperone 1	-0.807732
ANXA6	P08133	Annexin A6	-0.803088
DBN1	Q16643	Drebrin	-0.802658
TACO1	Q9BSH4	Translational activator of cytochrome c oxidase 1	-0.801682
SH3BGRL	O75368	SH3 domain-binding glutamic acid-rich-like protein	-0.798861
RAD23A	P54725	UV excision repair protein RAD23 homolog A	-0.797392
EIF4A2	Q14240	Eukaryotic initiation factor 4A-II	-0.794812
CD47	Q08722	Leukocyte surface antigen CD47	-0.791672
RABL3	Q5HYI8	Rab-like protein 3	-0.79148
DNPH1	O43598	2-deoxynucleoside 5-phosphate N-hydrolase 1	-0.783815
TPP2	P29144	Tripeptidyl-peptidase 2	-0.777668
SLC25A5	P05141	ADP/ATP translocase 2	-0.774718
CYB5A	P00167	Cytochrome b5	-0.773016
DAD1	P61803	Dolichyl-diphosphooligosaccharide--protein glycosyltransferase subunit DAD1	-0.768126
QARS	P47897	Glutamine--tRNA ligase	-0.767008
FDPS	P14324	Farnesyl pyrophosphate synthase	-0.765436
SCRN1	Q12765	Secernin-1	-0.761175
CRABP1	P29762	Cellular retinoic acid-binding protein 1	-0.754591
RCC1	P18754	Regulator of chromosome condensation	-0.751558
SLC9A3R1	O14745	Na(+)/H(+) exchange regulatory cofactor NHE-RF1	-0.732546
PTGES3	Q15185	Prostaglandin E synthase 3	-0.731765
CPSF6	Q16630	Cleavage and polyadenylation specificity factor subunit 6	-0.728769
GFM1	Q96RP9	Elongation factor G, mitochondrial	-0.727919
STAU1	O95793	Double-stranded RNA-binding protein Staufen homolog 1	-0.725368
VARS	P26640	Valine--tRNA ligase	-0.725185
ACAA1	P09110	3-ketoacyl-CoA thiolase, peroxisomal	-0.724719
FKBP8	Q14318	Peptidyl-prolyl cis-trans isomerase FKBP8	-0.723727
CARS	P49589	Cysteine--tRNA ligase, cytoplasmic	-0.719877
CLIC4	Q9Y696	Chloride intracellular channel protein 4	-0.718444
PTMA	P06454	Prothymosin alpha	-0.712333
GLA	P06280	Alpha-galactosidase A	-0.711778
SMPDL3B	Q92485	Acid sphingomyelinase-like phosphodiesterase 3b	-0.709302
KTN1	Q86UP2	Kinectin	-0.705339
SEC61B	P60468	Protein transport protein Sec61 subunit beta	-0.704449
TFG	Q92734	Protein TFG	-0.703552
NMT1	P30419	Glycylpeptide N-tetradecanoyltransferase 1	-0.703116
UBE2V2	Q15819	Ubiquitin-conjugating enzyme E2 variant 2	-0.702415
CBX1	P83916	Chromobox protein homolog 1	-0.698903
HINT2	Q9BX68	Histidine triad nucleotide-binding protein 2, mitochondrial	-0.692425
CKAP5	Q14008	Cytoskeleton-associated protein 5	-0.691415
SET	Q01105	Protein SET	-0.691053
TTC1	Q99614	Tetratricopeptide repeat protein 1	-0.687127
DNAJB12	Q9NXW2	DnaJ homolog subfamily B member 12	-0.686741
NSF	P46459	Vesicle-fusing ATPase	-0.68512
SLC25A1	P53007	Tricarboxylate transport protein, mitochondrial	-0.684829
CMAS	Q8NFW8	N-acylneuraminate cytidylyltransferase	-0.681817
TIPRL	O75663	TIP41-like protein	-0.679256
ITGAV	P06756	Integrin alpha-V	-0.671514
EIF2S3	P41091	Eukaryotic translation initiation factor 2 subunit 3	-0.6711
BOLA2	Q9H3K6	BolA-like protein 2	-0.668499
NDRG3	Q9UGV2	Protein NDRG3	-0.660254
TNPO2	O14787	Transportin-2	-0.660242
PSMD2	Q13200	26S proteasome non-ATPase regulatory subunit 2	-0.660232
SEL1L	Q9UBV2	Protein sel-1 homolog 1	-0.659492
HMGB3	O15347	High mobility group protein B3	-0.65358
MCM4	P33991	DNA replication licensing factor MCM4	-0.650472
PRMT5	O14744	Protein arginine N-methyltransferase 5	-0.647004
RELA	Q04206	Transcription factor p65	-0.642982
GEMIN5	Q8TEQ6	Gem-associated protein 5	-0.639884
SRRT	Q9BXP5	Serrate RNA effector molecule homolog	-0.638298
FAHD2A	Q96GK7	Fumarylacetoacetate hydrolase domain-containing protein 2A	-0.635437
DDX1	Q92499	ATP-dependent RNA helicase DDX1	-0.63393
CMBL	Q96DG6	Carboxymethylenebutenolidase homolog	-0.62321
SOD1	P00441	Superoxide dismutase [Cu-Zn]	-0.623208
ADK	P55263	Adenosine kinase	-0.622203
GYG1	P46976	Glycogenin-1	-0.620815
ASL	P04424	Argininosuccinate lyase	-0.620411
SEPT7	Q16181	Septin-7	-0.618287
EPPK1	P58107	Epiplakin	-0.617226
XRN2	Q9H0D6	5-3 exoribonuclease 2	-0.617035
BCAT2	O15382	Branched-chain-amino-acid aminotransferase, mitochondrial	-0.616448
ILF3	Q12906	Interleukin enhancer-binding factor 3	-0.612473
MCM5	P33992	DNA replication licensing factor MCM5	-0.611445
FAM98A	Q8NCA5	Protein FAM98A	-0.610638
RRM1	P23921	Ribonucleoside-diphosphate reductase large subunit	-0.609751
VAPA	Q9P0L0	Vesicle-associated membrane protein-associated protein A	-0.609056
RCC2	Q9P258	Protein RCC2	-0.608633
FKBP5	Q13451	Peptidyl-prolyl cis-trans isomerase FKBP5	-0.607766
TIAL1	Q01085	Nucleolysin TIAR	-0.604014
KDM1A	O60341	Lysine-specific histone demethylase 1A	-0.602539
SNRPD2	P62316	Small nuclear ribonucleoprotein Sm D2	-0.601154
CLPB	Q9H078	Caseinolytic peptidase B protein homolog	-0.600547
MAPRE1	Q15691	Microtubule-associated protein RP/EB family member 1	-0.593965
EIF5B	O60841	Eukaryotic translation initiation factor 5B	-0.590113
SMARCD2	Q92925	SWI/SNF-related matrix-associated actin-dependent regulator of chromatin subfamily D member 2	-0.589999
CAT	P04040	Catalase	-0.589982
TACSTD2	P09758	Tumor-associated calcium signal transducer 2	-0.582587
RECQL	P46063	ATP-dependent DNA helicase Q1	-0.579461
PTGES	O14684	Prostaglandin E synthase	-0.579268
UBE4A	Q14139	Ubiquitin conjugation factor E4 A	-0.578313
AHNAK	Q09666	Neuroblast differentiation-associated protein AHNAK	-0.578259
GMPS	P49915	GMP synthase [glutamine-hydrolyzing]	-0.571241
SART3	Q15020	Squamous cell carcinoma antigen recognized by T-cells 3	-0.569864
SDHA	P31040	Succinate dehydrogenase [ubiquinone] flavoprotein subunit, mitochondrial	-0.568396
NUCKS1	Q9H1E3	Nuclear ubiquitous casein and cyclin-dependent kinase substrate 1	-0.56248
CIAPIN1	Q6FI81	Anamorsin	-0.560205
DECR1	Q16698	2,4-dienoyl-CoA reductase, mitochondrial	-0.558187
ARPC1A	Q92747	Actin-related protein 2/3 complex subunit 1A	-0.558128
INF2	Q27J81	Inverted formin-2	-0.557528
GPD1L	Q8N335	Glycerol-3-phosphate dehydrogenase 1-like protein	-0.55345
EIF5	P55010	Eukaryotic translation initiation factor 5	-0.553387
NUP210	Q8TEM1	Nuclear pore membrane glycoprotein 210	-0.550566
GSPT1	P15170	Eukaryotic peptide chain release factor GTP-binding subunit ERF3A	-0.550551
WDR77	Q9BQA1	Methylosome protein 50	-0.548731
UGP2	Q16851	UTP--glucose-1-phosphate uridylyltransferase	-0.54635
PDHB	P11177	Pyruvate dehydrogenase E1 component subunit beta, mitochondrial	-0.540621
CBR1	P16152	Carbonyl reductase [NADPH] 1	-0.538301
PARD6B	Q9BYG5	Partitioning defective 6 homolog beta	-0.535482
CORO7	P57737	Coronin-7	-0.528443
ANXA7	P20073	Annexin A7	-0.527102
PNP	P00491	Purine nucleoside phosphorylase	-0.525198
TMX1	Q9H3N1	Thioredoxin-related transmembrane protein 1	-0.523438
RRBP1	Q9P2E9	Ribosome-binding protein 1	-0.52046
BCAP31	P51572	B-cell receptor-associated protein 31	-0.520372
ALDH9A1	P49189	4-trimethylaminobutyraldehyde dehydrogenase	-0.520238
HACD2	Q6Y1H2	Very-long-chain (3R)-3-hydroxyacyl-CoA dehydratase 2	-0.519689
MCM3	P25205	DNA replication licensing factor MCM3	-0.518334
KPNA4	O00629	Importin subunit alpha-3	-0.518203
ACTN1	P12814	Alpha-actinin-1	-0.515899
TNPO1	Q92973	Transportin-1	-0.515124
PAIP1	Q9H074	Polyadenylate-binding protein-interacting protein 1	-0.511648
EIF3F	O00303	Eukaryotic translation initiation factor 3 subunit F	-0.503979
PUS1	Q9Y606	tRNA pseudouridine synthase	-0.50035
ATP1A1	P05023	Sodium/potassium-transporting ATPase subunit alpha-1	-0.498684
EIF2A	Q9BY44	Eukaryotic translation initiation factor 2A	-0.494874
PARK7	Q99497	Protein deglycase DJ-1	-0.494527
EIF4G1	Q04637	Eukaryotic translation initiation factor 4 gamma 1	-0.489378
ATP2B1	P20020	Plasma membrane calcium-transporting ATPase 1	-0.488486
NUDC	Q9Y266	Nuclear migration protein nudC	-0.488039
G3BP1	Q13283	Ras GTPase-activating protein-binding protein 1	-0.486733
PDCD6IP	Q8WUM4	Programmed cell death 6-interacting protein	-0.484604
ABCF1	Q8NE71	ATP-binding cassette sub-family F member 1	-0.482837
GGCT	O75223	Gamma-glutamylcyclotransferase	-0.481076
CTNNB1	P35222	Catenin beta-1	-0.48082
LCP1	P13796	Plastin-2	-0.473891
EIF3E	P60228	Eukaryotic translation initiation factor 3 subunit E	-0.472883
EIF3A	Q14152	Eukaryotic translation initiation factor 3 subunit A	-0.468706
GPS1	Q13098	COP9 signalosome complex subunit 1	-0.468652
TFRC	P02786	Transferrin receptor protein 1	-0.467139
CAPRIN1	Q14444	Caprin-1	-0.466743
GTF2I	P78347	General transcription factor II-I	-0.466474
PSMB1	P20618	Proteasome subunit beta type-1	-0.465477
EIF4A3	P38919	Eukaryotic initiation factor 4A-III	-0.465436
RER1	O15258	Protein RER1	-0.463601
PNPO	Q9NVS9	Pyridoxine-5-phosphate oxidase	-0.462887
PTRH2	Q9Y3E5	Peptidyl-tRNA hydrolase 2, mitochondrial	-0.459813
HNRNPK	P61978	Heterogeneous nuclear ribonucleoprotein K	-0.45542
DCXR	Q7Z4W1	L-xylulose reductase	-0.451249
DHCR7	Q9UBM7	7-dehydrocholesterol reductase	-0.448219
EIF3L	Q9Y262	Eukaryotic translation initiation factor 3 subunit L	-0.448032
ARL8B	Q9NVJ2	ADP-ribosylation factor-like protein 8B	-0.447791
DDX21	Q9NR30	Nucleolar RNA helicase 2	-0.447759
SMC2	O95347	Structural maintenance of chromosomes protein 2	-0.444066
MMAB	Q96EY8	Cob(I)yrinic acid a,c-diamide adenosyltransferase, mitochondrial	-0.441282
RUVBL2	Q9Y230	RuvB-like 2	-0.440961
SFPQ	P23246	Splicing factor, proline- and glutamine-rich	-0.438876
PRKAR2A	P13861	cAMP-dependent protein kinase type II-alpha regulatory subunit	-0.438402
HSP90AA1	P07900	Heat shock protein HSP 90-alpha	-0.433273
LUC7L2	Q9Y383	Putative RNA-binding protein Luc7-like 2	-0.430274
COPG1	Q9Y678	Coatomer subunit gamma-1	-0.429201
EIF4G2	P78344	Eukaryotic translation initiation factor 4 gamma 2	-0.429118
PREB	Q9HCU5	Prolactin regulatory element-binding protein	-0.42898
KRT18	P05783	Keratin, type I cytoskeletal 18	-0.427247
GLRX3	O76003	Glutaredoxin-3	-0.425115
BLVRB	P30043	Flavin reductase (NADPH)	-0.422014
GSTM3	P21266	Glutathione S-transferase Mu 3	-0.419227
FLNA	P21333	Filamin-A	-0.414662
PCBP1	Q15365	Poly(rC)-binding protein 1	-0.410262
PGAM1	P18669	Phosphoglycerate mutase 1	-0.409654
PCBD1	P61457	Pterin-4-alpha-carbinolamine dehydratase	-0.406783
ETF1	P62495	Eukaryotic peptide chain release factor subunit 1	-0.39697
TOMM70A	O94826	Mitochondrial import receptor subunit TOM70	-0.38532
VDAC1	P21796	Voltage-dependent anion-selective channel protein 1	0.408596
SLC25A13	Q9UJS0	Calcium-binding mitochondrial carrier protein Aralar2	0.418674
HIST2H2BE	Q16778	Histone H2B type 2-E	0.424375
MTCH2	Q9Y6C9	Mitochondrial carrier homolog 2	0.43377
LPCAT1	Q8NF37	Lysophosphatidylcholine acyltransferase 1	0.434813
NACA	Q13765	Nascent polypeptide-associated complex subunit alpha	0.44409
WDR1	O75083	WD repeat-containing protein 1	0.444545
CAPN1	P07384	Calpain-1 catalytic subunit	0.464483
SNRPD1	P62314	Small nuclear ribonucleoprotein Sm D1	0.46635
ARPC4	P59998	Actin-related protein 2/3 complex subunit 4	0.478027
TUBA1B	P68363	Tubulin alpha-1B chain	0.486991
STT3A	P46977	Dolichyl-diphosphooligosaccharide--protein glycosyltransferase subunit STT3A	0.488713
DDOST	P39656	Dolichyl-diphosphooligosaccharide--protein glycosyltransferase 48 kDa subunit	0.499965
EMC3	Q9P0I2	ER membrane protein complex subunit 3	0.508095
COPE	O14579	Coatomer subunit epsilon	0.508537
CFL1	P23528	Cofilin-1	0.511088
MYO6	Q9UM54	Unconventional myosin-VI	0.513984
NOP2	P46087	Probable 28S rRNA (cytosine(4447)-C(5))-methyltransferase	0.515512
ACTB	P60709	Actin, cytoplasmic 1	0.516376
NME1-NME2	Q32Q12	Nucleoside diphosphate kinase	0.522278
HACD3	Q9P035	Very-long-chain (3R)-3-hydroxyacyl-CoA dehydratase 3	0.522471
NUTF2	P61970	Nuclear transport factor 2	0.527151
TMED2	Q15363	Transmembrane emp24 domain-containing protein 2	0.528907
SLC7A5	Q01650	Large neutral amino acids transporter small subunit 1	0.537035
EMC7	Q9NPA0	ER membrane protein complex subunit 7	0.543468
NQO1	P15559	NAD(P)H dehydrogenase [quinone] 1	0.543716
MGST1	P10620	Microsomal glutathione S-transferase 1	0.549878
PIP4K2C	Q8TBX8	Phosphatidylinositol 5-phosphate 4-kinase type-2 gamma	0.559874
HNRNPD	Q14103	Heterogeneous nuclear ribonucleoprotein D0	0.564979
ACTC1	P68032	Actin, alpha cardiac muscle 1	0.571913
RPL11	P62913	60S ribosomal protein L11	0.575881
RPN2	P04844	Dolichyl-diphosphooligosaccharide--protein glycosyltransferase subunit 2	0.577913
ATP5C1	P36542	ATP synthase subunit gamma, mitochondrial	0.582086
VDAC3	Q9Y277	Voltage-dependent anion-selective channel protein 3	0.585155
ABHD12	Q8N2K0	Monoacylglycerol lipase ABHD12	0.586996
CKAP4	Q07065	Cytoskeleton-associated protein 4	0.594171
PSMA4	P25789	Proteasome subunit alpha type-4	0.596643
NAP1L1	P55209	Nucleosome assembly protein 1-like 1	0.604637
SPCS1	Q9Y6A9	Signal peptidase complex subunit 1	0.61036
LARS	Q9P2J5	Leucine--tRNA ligase, cytoplasmic	0.620659
HMGCL	P35914	Hydroxymethylglutaryl-CoA lyase, mitochondrial	0.623722
SLC3A2	P08195	4F2 cell-surface antigen heavy chain	0.625105
ERP29	P30040	Endoplasmic reticulum resident protein 29	0.634262
TUBB4B	P68371	Tubulin beta-4B chain	0.642258
EIF6	P56537	Eukaryotic translation initiation factor 6	0.643289
SPCS2	Q15005	Signal peptidase complex subunit 2	0.648108
HSPB1	P04792	Heat shock protein beta-1	0.653126
GANAB	Q14697	Neutral alpha-glucosidase AB	0.663392
SCARB2	Q14108	Lysosome membrane protein 2	0.67106
TCP1	P17987	T-complex protein 1 subunit alpha	0.671412
PSMB6	P28072	Proteasome subunit beta type-6	0.686474
LRPAP1	P30533	Alpha-2-macroglobulin receptor-associated protein	0.686942
PCYOX1	Q9UHG3	Prenylcysteine oxidase 1	0.696168
SRSF1	Q07955	Serine/arginine-rich splicing factor 1	0.696439
CLINT1	Q14677	Clathrin interactor 1	0.700456
PAPSS2	O95340	Bifunctional 3-phosphoadenosine 5-phosphosulfate synthase 2	0.700466
PPIL1	Q9Y3C6	Peptidyl-prolyl cis-trans isomerase-like 1	0.701706
OXCT1	P55809	Succinyl-CoA:3-ketoacid coenzyme A transferase 1, mitochondrial	0.704237
SURF4	O15260	Surfeit locus protein 4	0.707248
CRABP2	P29373	Cellular retinoic acid-binding protein 2	0.709762
CTSA	P10619	Lysosomal protective protein	0.711895
LMAN2	Q12907	Vesicular integral-membrane protein VIP36	0.714188
GLO1	Q04760	Lactoylglutathione lyase	0.724957
HMOX2	P30519	Heme oxygenase 2	0.732126
RALY	Q9UKM9	RNA-binding protein Raly	0.732602
EPCAM	P16422	Epithelial cell adhesion molecule	0.738364
PSMD8	P48556	26S proteasome non-ATPase regulatory subunit 8	0.741529
SPCS3	P61009	Signal peptidase complex subunit 3	0.744026
SSBP1	Q04837	Single-stranded DNA-binding protein, mitochondrial	0.752834
PRKDC	P78527	DNA-dependent protein kinase catalytic subunit	0.754485
SLC25A24	Q6NUK1	Calcium-binding mitochondrial carrier protein SCaMC-1	0.763244
AAMP	Q13685	Angio-associated migratory cell protein	0.766241
TUBB	P07437	Tubulin beta chain	0.769773
SH3GLB2	Q9NR46	Endophilin-B2	0.825708
TMED3	Q9Y3Q3	Transmembrane emp24 domain-containing protein 3	0.826654
ADI1	Q9BV57	1,2-dihydroxy-3-keto-5-methylthiopentene dioxygenase	0.830733
SNRPD3	P62318	Small nuclear ribonucleoprotein Sm D3	0.835852
LXN	Q9BS40	Latexin	0.842553
H1F0	P07305	Histone H1.0	0.845555
LMCD1	Q9NZU5	LIM and cysteine-rich domains protein 1	0.8523
ASNS	P08243	Asparagine synthetase [glutamine-hydrolyzing]	0.853768
PHB	P35232	Prohibitin	0.854837
CSNK2A1	P68400	Casein kinase II subunit alpha	0.860479
RPS9	P46781	40S ribosomal protein S9	0.881578
ARL3	P36405	ADP-ribosylation factor-like protein 3	0.882858
MRPL12	P52815	39S ribosomal protein L12, mitochondrial	0.894692
L1CAM	P32004	Neural cell adhesion molecule L1	0.896102
CETN2	P41208	Centrin-2	0.902408
EIF4H	Q15056	Eukaryotic translation initiation factor 4H	0.911104
CLTC	Q00610	Clathrin heavy chain 1	0.914539
CD9	P21926	CD9 antigen	0.922863
MOB1A	Q9H8S9	MOB kinase activator 1A	0.923137
THOP1	P52888	Thimet oligopeptidase	0.923195
MYDGF	Q969H8	Myeloid-derived growth factor	0.929066
PLS3	P13797	Plastin-3	0.939785
EEF1E1	O43324	Eukaryotic translation elongation factor 1 epsilon-1	0.961816
SSR1	P43307	Translocon-associated protein subunit alpha	0.973096
FKBP9	O95302	Peptidyl-prolyl cis-trans isomerase FKBP9	0.992305
ESRP1	Q6NXG1	Epithelial splicing regulatory protein 1	0.999207
TRMT112	Q9UI30	Multifunctional methyltransferase subunit TRM112-like protein	1.00033
CTNND1	O60716	Catenin delta-1	1.00179
NDUFA9	Q16795	NADH dehydrogenase [ubiquinone] 1 alpha subcomplex subunit 9, mitochondrial	1.00789
HGS	O14964	Hepatocyte growth factor-regulated tyrosine kinase substrate	1.01523
DNAJC10	Q8IXB1	DnaJ homolog subfamily C member 10	1.01899
SPR	P35270	Sepiapterin reductase	1.01919
CLU	P10909	Clusterin	1.02042
DDX54	Q8TDD1	ATP-dependent RNA helicase DDX54	1.02819
SMS	P52788	Spermine synthase	1.03909
RAB1A	P62820	Ras-related protein Rab-1A	1.04211
CBX3	Q13185	Chromobox protein homolog 3	1.04775
NDUFS1	P28331	NADH-ubiquinone oxidoreductase 75 kDa subunit, mitochondrial	1.04935
PRKAR1A	P10644	cAMP-dependent protein kinase type I-alpha regulatory subunit	1.06434
FLOT1	O75955	Flotillin-1	1.06873
HIST1H2BN	Q99877	Histone H2B type 1-N	1.09379
U2AF1	Q01081	Splicing factor U2AF 35 kDa subunit	1.09612
LAMP2	P13473	Lysosome-associated membrane glycoprotein 2	1.10416
RPS12	P25398	40S ribosomal protein S12	1.10623
FAM50A	Q14320	Protein FAM50A	1.10662
BCCIP	Q9P287	BRCA2 and CDKN1A-interacting protein	1.10777
SYNJ2BP	P57105	Synaptojanin-2-binding protein	1.12515
PPP6C	O00743	Serine/threonine-protein phosphatase 6 catalytic subunit	1.1462
RPL13A	P40429	60S ribosomal protein L13a	1.14672
BAG3	O95817	BAG family molecular chaperone regulator 3	1.17376
USP15	Q9Y4E8	Ubiquitin carboxyl-terminal hydrolase 15	1.18503
TMTC3	Q6ZXV5	Transmembrane and TPR repeat-containing protein 3	1.20345
PEF1	Q9UBV8	Peflin	1.22314
VMP1	Q96GC9	Vacuole membrane protein 1	1.23544
EDC4	Q6P2E9	Enhancer of mRNA-decapping protein 4	1.243
CCAR2	Q8N163	Cell cycle and apoptosis regulator protein 2	1.24619
EPT1	Q9C0D9	Ethanolaminephosphotransferase 1	1.25005
GUSB	P08236	Beta-glucuronidase	1.25239
GNPNAT1	Q96EK6	Glucosamine 6-phosphate N-acetyltransferase	1.25867
PIGK	Q92643	GPI-anchor transamidase	1.28367
ERAP1	Q9NZ08	Endoplasmic reticulum aminopeptidase 1	1.30072
RHOC	P08134	Rho-related GTP-binding protein RhoC	1.33188
DKFZp686J1372	Q5HYB6	Epididymis luminal protein 189	1.35604
CYP1B1	Q16678	Cytochrome P450 1B1	1.36193
PDXK	O00764	Pyridoxal kinase	1.36594
AGR2	O95994	Anterior gradient protein 2 homolog	1.38076
SCRIB	Q14160	Protein scribble homolog	1.38365
TMED1	Q13445	Transmembrane emp24 domain-containing protein 1	1.40936
SMC1A	Q14683	Structural maintenance of chromosomes protein 1A	1.4197
SNX6	Q9UNH7	Sorting nexin-6	1.4328
ACADM	P11310	Medium-chain specific acyl-CoA dehydrogenase, mitochondrial	1.43788
MAOB	P27338	Amine oxidase [flavin-containing] B	1.4432
TOR1AIP1	Q5JTV8	Torsin-1A-interacting protein 1	1.44736
ASAH1	Q13510	Acid ceramidase	1.45946
TMED9	Q9BVK6	Transmembrane emp24 domain-containing protein 9	1.47757
DCUN1D1	Q96GG9	DCN1-like protein 1	1.50519
LMNA	P02545	Prelamin-A/C	1.54734
HIST1H1B	P16401	Histone H1.5	1.58638
PPIA	P62937	Peptidyl-prolyl cis-trans isomerase A	1.58762
ECI1	P42126	Enoyl-CoA delta isomerase 1, mitochondrial	1.58833
NDUFS3	O75489	NADH dehydrogenase [ubiquinone] iron-sulfur protein 3, mitochondrial	1.62183
HIST1H1E	P10412	Histone H1.4	1.62775
SKP1	P63208	S-phase kinase-associated protein 1	1.62983
ARF6	P62330	ADP-ribosylation factor 6	1.6529
FAM162A	Q96A26	Protein FAM162A	1.65538
AIMP2	Q13155	Aminoacyl tRNA synthase complex-interacting multifunctional protein 2	1.66255
PRPF40A	O75400	Pre-mRNA-processing factor 40 homolog A	1.68459
PABPN1	Q86U42	Polyadenylate-binding protein 2	1.69431
ABCG2	Q9UNQ0	ATP-binding cassette sub-family G member 2	1.70544
SNRPG	P62308	Small nuclear ribonucleoprotein G	1.70715
RPL29	P47914	60S ribosomal protein L29	1.79596
IDH3A	P50213	Isocitrate dehydrogenase [NAD] subunit alpha, mitochondrial	1.80889
RRM2	P31350	Ribonucleoside-diphosphate reductase subunit M2	1.84922
DDAH1	O94760	N(G),N(G)-dimethylarginine dimethylaminohydrolase 1	1.85727
FKBP2	P26885	Peptidyl-prolyl cis-trans isomerase FKBP2	1.91615
HIST1H2AJ	Q99878	Histone H2A type 1-J	1.98262
EMC2	Q15006	ER membrane protein complex subunit 2	2.03445
BRI3BP	Q8WY22	BRI3-binding protein	2.035
AKR1C2	P52895	Aldo-keto reductase family 1 member C2	2.06517
MAP1LC3B	Q9GZQ8	Microtubule-associated proteins 1A/1B light chain 3B	2.10624
RPL24	P83731	60S ribosomal protein L24	2.15022
SNRPE	P62304	Small nuclear ribonucleoprotein E	2.15321
RPL36	Q9Y3U8	60S ribosomal protein L36	2.32379
RPS28	P62857	40S ribosomal protein S28	2.40996
CLTA	P09496	Clathrin light chain A	2.47011
ENO2	P09104	Gamma-enolase	2.86857
ADSS	P30520	Adenylosuccinate synthetase isozyme 2	3.02635
HSP90AB2P	Q58FF8	Putative heat shock protein HSP 90-beta 2	3.84056
